# Supplementary material
Source: MDPI journal article supplement (https://www.mdpi.com/1424-2818/9/1/9)
Supplement: s1 [file s1]

# Supplementary Materials: Potential Population Genetic Consequences of Habitat Fragmentation in Central European Forest Trees and Associated Understorey Species—An Introductory Survey

Christoph Dobeš, Heino Konrad and Thomas Geburek

**Supplementary Material 1 Reproductive system and ploidy of Central European tree species (including the Carpathians and the Carpathian basin) and observed population genetic differentiations.** Data were collected for population genetic studies from the whole of Europe. Estimates of population genetic differentiation were taken from the literature. We accepted published  $F_{st}$  (including  $\theta$ ),  $G_{st}$ , and  $\Phi$  values. These measures are known to give in most cases similar values (see Supplementary Material 2 for details). Alternative measures of population genetic differentiation ( $\delta$ ,  $D_j$ ,  $d_o$ ,  $R_{st}$ , Shannon-Weaver) were recalculated as  $F_{st}$  in case that allele frequency tables are provided by authors. Recalculated values carry the index “7”. Family affiliation according to APG [1]; <http://www.mobot.org/MOBOT/Research/APweb/>. The breeding system involves the distribution of sexes, the incompatibility system (SC = self-compatible; SI = self-incompatibility of unknown mechanism; pSI = postzygotic self-incompatibility system through expression of lethal alleles; gamSI = gametophytic SI), and the predominant mating system (X = outcrossed, S = selfed, M = mixed; F = facultative).

| Genus/Species     | Family Affiliation | Dispersal Ecology of Diaspores | Breeding System <sup>1</sup> | Ploidy and Chromosome Base Number x <sup>2</sup> | Genetic Population Differentiation              |                       |                                                   |                                     |                            |            |
|-------------------|--------------------|--------------------------------|------------------------------|--------------------------------------------------|-------------------------------------------------|-----------------------|---------------------------------------------------|-------------------------------------|----------------------------|------------|
|                   |                    |                                |                              |                                                  | <i>F</i> <sub>st</sub> (%) <sup>3</sup>         | <i>N</i> Population s | Mean Number of Individuals Per Population (Range) | <i>N</i> Loci <sup>4</sup>          | Spatial Scale <sup>5</sup> | References |
| wind-pollinated   |                    |                                |                              |                                                  |                                                 |                       |                                                   |                                     |                            |            |
| <i>Abies alba</i> | Pinaceae           | anemochorous                   | monoecy, pSI, X              | diploid, x = 12                                  | 4.9 <sup>Iso</sup> (δ)                          | 24                    | 52 (32–100)                                       | 16 (15 <sup>Po</sup> ) <sup>6</sup> | country (320)              | [2]        |
|                   |                    |                                |                              |                                                  | 8.1 <sup>Iso</sup> (δ)                          | 12                    | >20                                               | 10 (9 <sup>Po</sup> ) <sup>6</sup>  | regional (450)             | [3]        |
|                   |                    |                                |                              |                                                  | 2.9 <sup>Iso,7</sup>                            | 21                    | 27.8 (14–53)                                      | 9                                   | regional (150)             | [4]        |
|                   |                    |                                |                              |                                                  | 5.0 <sup>Iso,7</sup>                            | 7 (11) <sup>15</sup>  | na (15–28)                                        | 19 (11 <sup>Po</sup> )              | country (800)              | [5]        |
|                   |                    |                                |                              |                                                  | 7.3 <sup>Iso,7</sup>                            | 6                     | 130 (100–144)                                     | 4                                   | country (500)              | [6]        |
|                   |                    |                                |                              |                                                  | 5.8 <sup>Iso,7</sup>                            | 35                    | 114 (72–198)                                      |                                     | country (450)              |            |
|                   |                    |                                |                              |                                                  | 2.2 <sup>Iso,7</sup>                            | 13                    | 109.1 (78–198)                                    | 4                                   | regional (230)             | [7]        |
|                   |                    |                                |                              |                                                  | 2.1 <sup>Iso,7</sup>                            | 8                     | 129.5 (100–144)                                   |                                     | regional (270)             |            |
|                   |                    |                                |                              |                                                  | 2.3 <sup>Iso,7</sup>                            | 6                     | 102.3 (72–144)                                    |                                     | regional (60)              |            |
|                   |                    |                                |                              |                                                  | n 39.8 <sup>SSR</sup> (δ)                       |                       |                                                   | 3                                   |                            |            |
|                   |                    |                                |                              |                                                  | 2.9 <sup>Iso</sup> (δ)                          | 3                     | 51                                                | 16                                  | regional (100)             | [8,9]      |
|                   |                    |                                |                              |                                                  | n 3.5 <sup>SSR</sup> ( <i>R</i> <sub>st</sub> ) |                       |                                                   | 7                                   |                            |            |
|                   |                    |                                |                              |                                                  | cp 3.5 <sup>miniS</sup>                         | 33                    | 36.3 (12–44)                                      | 2 <sup>ha</sup>                     | country (400)              | [10]       |
|                   |                    |                                |                              |                                                  | 5.5 <sup>Iso,7</sup> (δ 4.4)                    | 18                    | 100                                               | 14                                  | country (400)              | [11]       |
|                   |                    |                                |                              |                                                  | 10.3 <sup>Iso</sup> ( <i>Dj</i> )               | 84                    | c. 50                                             | 12 (11 <sup>Po</sup> )              | continental (1800)         | [12]       |
|                   |                    |                                |                              |                                                  | 1.8 <sup>Iso</sup>                              | 8                     | 38.1 (29–50)                                      | 24 (21 <sup>Po</sup> ) <sup>6</sup> | regional (250)             | [13]       |
|                   |                    |                                |                              |                                                  | 4.9 <sup>Iso</sup>                              | 10                    | 31.3                                              | 13                                  | country (500)              | [14]       |

|                            |            |                |                   |                    |                                                      |    |                |                        |                       |         |
|----------------------------|------------|----------------|-------------------|--------------------|------------------------------------------------------|----|----------------|------------------------|-----------------------|---------|
|                            |            |                |                   |                    | 2.5 <sup>Iso,7</sup>                                 | 76 | 49.7           | 15                     | subcontinental (1300) | [15]    |
|                            |            |                |                   |                    | 1.5 <sup>Iso</sup>                                   | 5  | 29.8 (29–30)   | 15 (11 <sup>Po</sup> ) | regional (230)        | [16]    |
|                            |            |                |                   |                    | 12.9 <sup>Iso,7</sup>                                | 2  | 18.5 (17–20)   | 16 (8 <sup>Po</sup> )  | regional (10)         | [17]    |
|                            |            |                |                   |                    | n 0.9 <sup>SNP</sup>                                 | 37 | 32.0 (7–65)    |                        | subcontinental (1580) |         |
|                            |            |                |                   |                    | n 0.9 <sup>SNP</sup>                                 | 5  | 21.8 (15–25)   | 249                    | regional (210)        | [18]    |
|                            |            |                |                   |                    | n 0.6 <sup>SNP</sup>                                 | 15 | 35.4 (23–65)   |                        | regional (400)        |         |
|                            |            |                |                   |                    | n 0.7 <sup>SNP</sup>                                 | 10 | 34 (18–65)     |                        | regional (210)        |         |
|                            |            |                |                   |                    | n 1.1 <sup>SNP</sup>                                 | 6  | 19.7 (7–25)    |                        | country (880)         |         |
|                            |            |                |                   |                    | 8.8 <sup>Iso</sup> (G <sub>st</sub> )                | 10 | 27.1 (24–30)   | 15 (14 <sup>Po</sup> ) | country (1000)        | [19]    |
|                            |            |                |                   |                    | cp 18 <sup>SSR</sup> (Φ)                             | 11 | 16.5 (11–24)   | 81 <sup>ha</sup>       | regional (400)        | [20]    |
|                            |            |                |                   |                    | 9.5 <sup>Iso</sup>                                   | 16 | 53.8 (44–64)   | 3                      | continental (1800)    | [21]    |
|                            |            |                |                   |                    | cp 13.3 <sup>SSR</sup> (G <sub>st</sub> )            | 17 | 42 (10–110)    | 90 <sup>ha</sup>       | continental (2200)    | [22]    |
| <i>Alnus glutinosa</i>     | Betulaceae | anemochorous   | monoecy, gamSI, X | diploid, x = 14    | 2.2 <sup>Iso</sup>                                   | 3  | 60 (39–93)     | 16 (12 <sup>Po</sup> ) | regional (10)         | [23]    |
|                            |            |                |                   |                    | cp 88.6 <sup>RFLP</sup> (G <sub>st</sub> )           | 43 | 3.4 (3–5)      | 13 <sup>ha</sup>       | continental (3400)    | [24]    |
|                            |            |                |                   |                    | cp 81 <sup>RFLP</sup> (G <sub>st</sub> )             | 25 | 9.4            | 12 <sup>ha</sup>       | continental (3600)    | [25]    |
|                            |            |                |                   |                    | 20.4 <sup>Iso</sup>                                  | 37 | 5              | 19                     | continental (1200)    | [26]    |
| <i>Alnus incana</i>        | Betulaceae | anemochorous   | monoecy, gamSI, X | diploid, x = 14    |                                                      |    |                |                        |                       |         |
| <i>Betula pendula</i>      | Betulaceae | anemochorous   | monoecy, gamSI, X | diploid, x = 14    | 3.2 <sup>Iso</sup>                                   | 7  | 47.2 (37–57)   | 18 (13 <sup>Po</sup> ) | subcontinental (1400) | [27,28] |
|                            |            |                |                   |                    | cp 42.0 <sup>RFLP</sup> (G <sub>st</sub> )           | 47 | 9.2 (2–12)     | 13 <sup>ha</sup>       | continental (4500)    | [29]    |
|                            |            |                |                   |                    | cp 38.3 <sup>RFLP</sup> (G <sub>st</sub> )           | 14 | 8              | 10 <sup>ha</sup>       | continental (3600)    | [30]    |
|                            |            |                |                   |                    | cp 42.0 <sup>RFLP</sup> (G <sub>st</sub> )           | 23 | 9.3            | 9 <sup>ha</sup>        | continental (3500)    | [25]    |
| <i>Betula pubescens</i>    | Betulaceae | anemochorous   | monoecy, SI, X    | tetraploid, x = 14 | cp 28.8 <sup>RFLP</sup> (G <sub>st</sub> )           | 20 | 8              | 6 <sup>ha</sup>        | continental (3600)    | [30]    |
| <i>Carpinus betulus</i>    | Betulaceae | anemochorous   | monoecy           | octoploid, x = 8   | n 7.4 <sup>AFLP</sup>                                | 20 | 10.1 (5–21)    | 117 <sup>mo</sup>      | continental (2600)    |         |
|                            |            |                |                   |                    | n 4.7 <sup>AFLP</sup>                                | 18 | 18.9 (8–30)    | 114 <sup>mo</sup>      | country (220)         | [31]    |
|                            |            |                |                   |                    | cp 97.2 <sup>RFLP</sup> (G <sub>st</sub> )           | 36 | 7.6 (3–15)     | na                     | continental (2500)    | [32]    |
|                            |            |                |                   |                    | cp 100 <sup>RFLP</sup> (G <sub>st</sub> )            | 18 | 9.6            | 4 <sup>ha</sup>        | continental (2500)    | [25]    |
| <i>Carpinus orientalis</i> | Betulaceae | anemochorous   | monoecy           | diploid, x = 8     | cp 97.2 <sup>RFLP, SSR, seq</sup> (G <sub>st</sub> ) | 5  | 9.4 (5–12)     | 8 <sup>ha</sup>        | continental (850)     | [32]    |
| <i>Corylus colurna</i>     | Betulaceae | endozoochorous | monoecy           | diploid, x = 14    |                                                      |    |                |                        |                       |         |
| <i>Fagus sylvatica</i>     | Fagaceae   | endozoochorous | monoecy, gamSI, X | diploid, x = 12    | 3.1 <sup>Iso,7</sup> (Dj) 5.8)                       | 6  | 50             | 16                     | country (300)         | [33]    |
|                            |            |                |                   |                    | 4.3 <sup>Iso</sup> (G <sub>st</sub> )                | 11 | ≥80            | 10 (8 <sup>Po</sup> )  | regional (190)        | [34]    |
|                            |            |                |                   |                    | 1.0 <sup>Iso,7</sup> (d0 6.1)                        | 2  | 50             | 16                     | regional (15)         | [35]    |
|                            |            |                |                   |                    | n 5.8 <sup>SSR</sup>                                 | 10 | 129.7 (90–286) | 4                      | continental (1300)    | [36]    |
|                            |            |                |                   |                    | 4.2 <sup>Iso</sup>                                   | 24 |                |                        | regional (500)        |         |
|                            |            |                |                   |                    | 3.5 <sup>Iso</sup>                                   | 31 | 50             | 4                      | regional (350)        | [37]    |
|                            |            |                |                   |                    | 5.0 <sup>Iso</sup>                                   | 18 |                |                        | regional (500)        |         |
|                            |            |                |                   |                    | 4.6 <sup>Iso</sup>                                   | 30 |                |                        | regional (800)        |         |

|                              |          |                                            |                 |                                           |                                     |                       |                                          |
|------------------------------|----------|--------------------------------------------|-----------------|-------------------------------------------|-------------------------------------|-----------------------|------------------------------------------|
|                              |          | 5.4 <sup>Iso</sup>                         | 99              |                                           |                                     | continental (1600)    |                                          |
|                              |          | 3.8 <sup>Iso</sup>                         | 64              |                                           |                                     | subcontinental (900)  | [38] <sup>s</sup>                        |
|                              |          | 7.1 <sup>Iso</sup>                         | 35              |                                           |                                     | subcontinental (700)  |                                          |
|                              |          | 0.3 <sup>Iso</sup>                         | 6               |                                           |                                     | country (450)         |                                          |
|                              |          | 3.3 <sup>Iso</sup>                         | 30              | 50                                        | 6                                   | country (450)         |                                          |
|                              |          | 2.6 <sup>Iso</sup>                         | 11              |                                           |                                     | country (600)         |                                          |
|                              |          | 4.6 <sup>Iso</sup>                         | 33              |                                           |                                     | regional (250)        |                                          |
|                              |          | 5.8 <sup>Iso</sup>                         | 10              |                                           |                                     | country (850)         |                                          |
|                              |          | 3.6 <sup>Iso</sup>                         | 9               |                                           |                                     | regional (100)        |                                          |
|                              |          | 4.6 <sup>Iso</sup>                         | 35              | c. 50                                     | 6                                   | regional (200)        | [39]                                     |
|                              |          | 1.95 <sup>Iso,7</sup>                      | 78              | 50                                        | 11                                  | subcontinental (1400) | [40]                                     |
|                              |          | 5.9 <sup>Iso</sup>                         | 389             | 47.4                                      | 15 (12 <sup>po</sup> )              | continental (2300)    | [41]                                     |
|                              |          | 7.8 <sup>Iso</sup>                         | 250             | 50                                        | 3                                   | continental (2400)    | [42]                                     |
|                              |          | cp 83.0 <sup>RFLP</sup> (G <sub>st</sub> ) | 85              | 4.7 (5–20)                                | 11 <sup>ha</sup>                    | continental (2700)    | [43]                                     |
|                              |          | 3.25 <sup>Iso</sup>                        | 48              | 50                                        | 12                                  | country (900)         | [44]                                     |
|                              |          | 2.0 <sup>Iso,7</sup>                       | 20              | 50                                        | 12                                  | country (700)         | [45]                                     |
|                              |          | 1.3 <sup>Iso</sup>                         | 11              |                                           |                                     | regional (140)        |                                          |
|                              |          | 1.4 <sup>Iso</sup>                         | 4               |                                           |                                     | regional (100)        |                                          |
|                              |          | 0.7 <sup>Iso</sup>                         | 7               | c. 50                                     | 12                                  | regional (220)        | [46]                                     |
|                              |          | 1.3 <sup>Iso</sup>                         | 22              |                                           |                                     | regional (280)        |                                          |
|                              |          | 3.0 <sup>Iso</sup>                         | 139             | ≥50                                       | 12                                  | subcontinental (1600) | [47]                                     |
|                              |          | 3.2 <sup>Iso</sup>                         | 178             | 56.2 (45–86)                              | 12                                  | country (700)         | [48]                                     |
|                              |          | 2.9 <sup>Iso</sup> (δ)                     | 23              | 195.7 (101–200)                           | 11                                  | regional (180)        | [49]                                     |
|                              |          | cp 61.5 <sup>RFLP</sup>                    | 40              | 5                                         | 13 <sup>ha</sup>                    | country (700)         | [50]                                     |
|                              |          | 3.2 <sup>Iso</sup>                         | 4               |                                           |                                     | regional (100)        |                                          |
|                              |          | 2.6 <sup>Iso</sup>                         | 10              |                                           |                                     | regional (160)        |                                          |
|                              |          | 4.0 <sup>Iso</sup>                         | 8               | c. 50                                     | 11                                  | regional (380)        | [51]                                     |
|                              |          | 1.4 <sup>Iso</sup>                         | 16              |                                           |                                     | regional (350)        |                                          |
|                              |          | 1.9 <sup>Iso</sup> (G <sub>st</sub> )      | 20              | 100.8 (68–118)                            | 16 (12 <sup>po</sup> ) <sup>6</sup> | regional (400)        | [52]                                     |
|                              |          | 4.6 <sup>Iso</sup>                         | 21              | 103.5 (38–193)                            | 10 (9 <sup>po</sup> )               | country (1100)        | [53]                                     |
|                              |          | 4.6 <sup>Iso</sup>                         | 27              | 30 (21–82)                                | 11                                  | regional (250)        | [54]                                     |
|                              |          | 7.5 <sup>Iso,7</sup>                       | 2               | 150 (136–164)                             | 8                                   | regional (10)         | [55]                                     |
|                              |          | 1.6 <sup>Iso</sup>                         | 5               | 172 (78–216)                              | 16                                  | country (420)         | [56] <sup>s</sup>                        |
|                              |          | 1.2 <sup>Iso,18</sup>                      | 110 (9 regions) | 50                                        | 12                                  | continental (1500)    | [57]                                     |
|                              |          | cp 74.0 <sup>RFLP</sup> (G <sub>st</sub> ) | 23              | 9.4                                       | 6 <sup>ha</sup>                     | continental (2800)    | [25]                                     |
|                              |          | n 2.2 <sup>SSR</sup>                       | 10              | 120.5 (100–200)                           | 9                                   | regional (620)        | [58]                                     |
|                              |          | 2.4 <sup>Iso</sup> (δ 5.3)                 | 20              | 102.9 (100–130)                           | 11                                  | regional (250)        | [59]                                     |
|                              |          | 1.3 <sup>Iso</sup>                         | 3               | 64.3 (24–99)                              | 9                                   | regional (50)         | [60]                                     |
| <i>Fraxinus angustifolia</i> | Oleaceae | anemochorous                               | diploid, x = 23 | cp 91.3 <sup>SSR</sup> (G <sub>st</sub> ) | 70                                  | 6.11 (3–12)           | 13 <sup>ha</sup> continental (3300) [61] |

|                            |              |                |                  |                    |                                             |     |                  |                          |                       |                   |
|----------------------------|--------------|----------------|------------------|--------------------|---------------------------------------------|-----|------------------|--------------------------|-----------------------|-------------------|
|                            |              |                |                  |                    | n 2.2 <sup>SSR</sup>                        | 11  | 31.4 (29–39)     | 6                        | country (450)         | [62]              |
|                            |              |                |                  |                    | cp 94.0 <sup>RFLP</sup> (G <sub>st</sub> )  | 20  | 6.4              | 7 <sup>ha</sup>          | na                    | Vendramin in [63] |
| <i>Fraxinus excelsior</i>  | Oleaceae     | anemochorous   | trioecy, FX      | diploid, x = 23    | n 2.3 <sup>SSR</sup>                        | 10  | 24               | 6                        | country (300)         | [64]              |
|                            |              |                |                  |                    | n 3.7 <sup>SSR</sup> (R <sub>st</sub> )     | 38  | 27.7 (4–40)      | 7                        | regional (360)        | [65]              |
|                            |              |                |                  |                    | cp 94.9 <sup>SSR</sup> (R <sub>st</sub> )   |     |                  | na                       |                       |                   |
|                            |              |                |                  |                    | n 8.7 <sup>SSR</sup>                        | 10  | 32.1 (20–37)     | 6                        | country (500)         | [66]              |
|                            |              |                |                  |                    | cp 89.0 <sup>SSR</sup> (G <sub>st</sub> )   | 201 | 6.4 (2–23)       | 12 <sup>ha</sup>         | continental (3500)    | [67]              |
| <i>Juniperus communis</i>  | Cupressaceae | endozoochorous | mostly dioecy, X | diploid, x = 11    | 12.0 <sup>Iso</sup>                         | 35  | 34.3 (9–55)      | 10                       | continental (7200)    | [68]              |
|                            |              |                |                  |                    | 41.0 <sup>AFLP</sup> (Φ)                    | 23  | 13.4 (6–18)      | 216 (208 <sup>po</sup> ) | continental (2100)    | [69]              |
|                            |              |                |                  |                    | 2.6 <sup>Iso</sup>                          | 12  | 43.5 (25–59)     | 18 (17 <sup>po</sup> )   | regional (100)        | [70]              |
|                            |              |                |                  |                    | n 9.6 <sup>SSR</sup> (Φ)                    | 19  | 16.3 (5–34)      | 3                        | country (450)         | [71]              |
|                            |              |                |                  |                    | cp 24.9 <sup>SNP</sup> (Φ)                  |     |                  | 6 <sup>ha</sup>          |                       |                   |
| <i>Juniperus thurifera</i> | Cupressaceae | endozoochorous | dioecy, X        | tetraploid, x = 11 | n 3.6 <sup>SSR,12</sup>                     | 11  | 23.7 (20–30)     | 6                        | subcontinental (1400) | [72]              |
| <i>Juglans regia</i>       | Juglandaceae | zoochorous     | monoecy, SC, M   | diploid, x = 16    | 15 <sup>Iso</sup>                           | 21  | 23.2 (na)        | 5                        | regional (70)         | [73]              |
|                            |              |                |                  |                    | n 5.4 <sup>SSR</sup> (θ)                    | 29  | 15.7 (8–29)      | 10                       | country (1100)        | [74]              |
| <i>Larix decidua</i>       | Pinaceae     | anemochorous   | monoecy, ± SI, X | diploid, x = 12    | 4.1 <sup>Iso</sup> (G <sub>st</sub> )       | 11  | c. 100           | 18                       | country (900)         | [75]              |
|                            |              |                |                  |                    | 5.1 <sup>Iso</sup> (G <sub>st</sub> )       | 7   | na               | 7 (5 <sup>po</sup> )     | subcontinental (900)  | [76]              |
|                            |              |                |                  |                    | n 1.1 <sup>SNP</sup>                        | 24  | 34.5 (1–65)      |                          | country (540)         |                   |
|                            |              |                |                  |                    | n 1.7 <sup>SNP</sup>                        | 5   | 17.8 (13–24)     |                          | regional (160)        |                   |
|                            |              |                |                  |                    | n 0.7 <sup>SNP</sup>                        | 15  | 40.5 (20–65)     | 267                      | regional (280)        | [18]              |
|                            |              |                |                  |                    | n 0.7 <sup>SNP</sup>                        | 2   | 63.5 (63–64)     |                          | regional (25)         |                   |
|                            |              |                |                  |                    | n 8.2 <sup>SSR</sup>                        | 18  | 22.9 (20–24)     | 13                       | subcontinental (1500) | [77]              |
|                            |              |                |                  |                    | n 8 <sup>SSR</sup>                          | 45  | 22.8             | 13                       | subcontinental (1500) | [77]              |
|                            |              |                |                  |                    | mt 52 <sup>SNP</sup> (G <sub>st</sub> )     | 43  | 8.4              | 22 <sup>ha</sup>         |                       |                   |
| <i>Ostrya carpinifolia</i> | Betulaceae   | anemochorous   | monoecy          | diploid, x = 8     |                                             |     |                  |                          |                       |                   |
| <i>Picea abies</i>         | Pinaceae     | anemochorous   | monoecy, pSI, X  | diploid, x = 12    | 4.0 <sup>Iso</sup>                          | 9   | 200              | 4                        | continental (2200)    | [78] <sup>s</sup> |
|                            |              |                |                  |                    | 4.9 <sup>Iso</sup> (δ)                      | 10  | >20              | 10                       | regional (450)        | [3]               |
|                            |              |                |                  |                    | 1.2 <sup>Iso</sup>                          | 29  | 100              | 17                       | country (420)         | [79]              |
|                            |              |                |                  |                    | 7.8 <sup>Iso</sup>                          | 9   | na (<18–40)      | 21 (17 <sup>po</sup> )   | regional (450)        | [80]              |
|                            |              |                |                  |                    | mt 41.0 <sup>miniS</sup> (G <sub>st</sub> ) | 36  | 20               | 10 <sup>ha</sup>         | regional (1000)       | [81]              |
|                            |              |                |                  |                    | 5.2 <sup>Iso</sup> (G <sub>st</sub> )       | 70  | 40.9 (28–52)     | 22 (16 <sup>po</sup> )   | continental (4300)    | [82] <sup>s</sup> |
|                            |              |                |                  |                    | 2.0 <sup>Iso</sup>                          | 11  | 62 (35–80)       | 4                        | country (1300)        | [83] <sup>s</sup> |
|                            |              |                |                  |                    | 3.0 <sup>Iso</sup>                          | 4   | 58.8 (49–64)     | 12 (11 <sup>po</sup> )   | country (900)         | [84] <sup>s</sup> |
|                            |              |                |                  |                    | n 5 <sup>SSR</sup>                          | 6   | 31.2 (30–33)     | 7                        | regional (180)        | [85]              |
|                            |              |                |                  |                    | 3.9 <sup>Iso</sup> (G <sub>st</sub> )       | 19  | c. 32 (c. 18–40) | 19 (17 <sup>po</sup> )   | country (500)         | [86]              |
|                            |              |                |                  |                    | 4.3 <sup>Iso</sup> (δ)                      | 20  | 100              | 18                       | regional (300)        | [87]              |

|                                                                                   |          |                |                  |                 |                                       |     |               |                        |                       |                       |
|-----------------------------------------------------------------------------------|----------|----------------|------------------|-----------------|---------------------------------------|-----|---------------|------------------------|-----------------------|-----------------------|
|                                                                                   |          |                |                  |                 | 12.0 <sup>Iso</sup> ( $G_{st}$ )      | 2   | 23.5 (22–25)  | 14                     | continental (2000)    | [88]                  |
|                                                                                   |          |                |                  |                 | 0.5 <sup>Iso</sup>                    | 2   | 50.5 (50–51)  | 14                     | regional (2)          | [89]                  |
|                                                                                   |          |                |                  |                 | 0.9 <sup>Iso</sup>                    | 11  | 63.2 (30–100) | 12                     | country (400)         | [90]                  |
|                                                                                   |          |                |                  |                 | mt 67.6 <sup>miniS</sup> ( $G_{st}$ ) | 90  | 10.4 (4–16)   | 18 <sup>ha</sup>       | continental (2800)    | [91]                  |
|                                                                                   |          |                |                  |                 | 2.5 <sup>Iso</sup>                    | 19  | c. 40         | 6                      | regional (120)        | [92] <sup>s</sup>     |
|                                                                                   |          |                |                  |                 | 5.0 <sup>Iso</sup>                    | 10  | 59.7 (18–107) | 6                      | country (900)         | [93] <sup>s</sup>     |
|                                                                                   |          |                |                  |                 | mt 63.8 <sup>miniS</sup> ( $G_{st}$ ) | 369 | 13.2 (4–30)   | 28 <sup>ha</sup>       | continental (2800)    | [94]                  |
|                                                                                   |          |                |                  |                 | n 2.9 <sup>SSR</sup>                  |     | 46.4 (26–48)  | 7                      |                       |                       |
|                                                                                   |          |                |                  |                 | mt 31.7 <sup>miniS</sup> ( $G_{st}$ ) | 37  | 17.4 (13–30)  | 10 <sup>ha</sup>       | continental (3000)    | [95]                  |
|                                                                                   |          |                |                  |                 | n 0.2 <sup>SSR</sup>                  | 3   | 150           | 6                      | regional (5)          | [96]                  |
|                                                                                   |          |                |                  |                 | cp 10.0 <sup>SSR</sup> ( $R_{st}$ )   | 97  | 11.4 (9–25)   | 41 <sup>ha</sup>       | continental (2500)    | [97]                  |
| <i>Pinus cembra</i>                                                               | Pinaceae | endozoochorous | monoecy, FX      | diploid, x = 12 | 2.7 <sup>Iso</sup> ( $G_{st}$ )       | 5   | ≥40           | 13                     | regional (150)        | [98]                  |
|                                                                                   |          |                |                  |                 | 4.0 <sup>Iso</sup>                    | 5   | na            | 30 (22 <sup>po</sup> ) | subcontinental (1200) | [99]                  |
|                                                                                   |          |                |                  |                 | cp 6.8 <sup>SSR</sup>                 | 39  | 16            | 28 <sup>ha</sup>       | country (280)         | [100]                 |
|                                                                                   |          |                |                  |                 | cp 2.0 <sup>SSR</sup>                 | 4   | 37 (10–57)    | 41 <sup>ha</sup>       | country (450)         | [101]                 |
|                                                                                   |          |                |                  |                 | n 5.5 <sup>SSR</sup>                  |     |               | 6                      |                       |                       |
|                                                                                   |          |                |                  |                 | cp 9.5 <sup>SSR</sup> ( $\Phi$ )      | 11  | 15.9 (7–26)   | 33 <sup>ha</sup>       | country (300)         | [102]                 |
|                                                                                   |          |                |                  |                 | n 0.5 <sup>SNP</sup>                  | 24  | 34.3 (18–65)  |                        | country (630)         |                       |
|                                                                                   |          |                |                  |                 | n 0.3 <sup>SNP</sup>                  | 5   | 25            | 459                    | regional (110)        |                       |
|                                                                                   |          |                |                  |                 | n 0.3 <sup>SNP</sup>                  | 4   | 24.5 (25–65)  |                        | regional (250)        | [18]                  |
|                                                                                   |          |                |                  |                 | n 0.3 <sup>SNP</sup>                  | 15  | 34.7 (18–65)  |                        | regional (100)        |                       |
|                                                                                   |          |                |                  |                 | 32.0 <sup>Iso</sup>                   | 11  | 22.5          | 8                      | continental (7200)    | [103] <sup>s</sup>    |
| <i>Pinus halepensis</i>                                                           | Pinaceae | anemochorous   | monoecy          | diploid, x = 12 | 10.9 <sup>Iso</sup>                   | 6   | 25            | 15 (4 <sup>po</sup> )  | country (800)         | [104]                 |
|                                                                                   |          |                |                  |                 | cp 30.8 <sup>SSR</sup> ( $G_{st}$ )   | 10  | 13 (9–16)     | 28 <sup>ha</sup>       | continental (4000)    | [105]                 |
| <i>Pinus mugo</i> agg.<br>(incl. <i>Pinus uncinata</i> , <i>Pinus uliginosa</i> ) | Pinaceae | anemochorous   | monoecy, FX      | diploid, x = 12 | cp 8.3 <sup>SSR</sup>                 | 12  | 31.6 (30–33)  | 168 <sup>ha</sup>      | country (650)         | [106]                 |
|                                                                                   |          |                |                  |                 | cp 7.21 <sup>SSR</sup> ( $G_{st}$ )   | 13  | 29.6 (25–30)  | 174 <sup>ha</sup>      | subcontinental (900)  | [107]                 |
|                                                                                   |          |                |                  |                 | cp 7.0 <sup>SSR</sup> ( $G_{st}$ )    | 29  | 27.1 (13–91)  | 100 <sup>ha</sup>      | continental (1600)    | [108]                 |
|                                                                                   |          |                |                  |                 | 12.5 <sup>Iso,7</sup>                 | 5   | 33.4 (15–47)  | 15 (13 <sup>po</sup> ) | continental (2100)    | [109]                 |
|                                                                                   |          |                |                  |                 | n 0.2 <sup>SNP</sup>                  | 27  | 31.4 (18–65)  |                        | country (650)         |                       |
|                                                                                   |          |                |                  |                 | n 0.5 <sup>SNP</sup>                  | 4   | 24.8 (22–26)  | 693                    | regional (140)        |                       |
|                                                                                   |          |                |                  |                 | n 0.5 <sup>SNP</sup>                  | 6   | 25.5 (22–61)  |                        | regional (310)        | [18]                  |
|                                                                                   |          |                |                  |                 | n 0.3 <sup>SNP</sup>                  | 16  | 32.0 (18–65)  |                        | regional (180)        |                       |
|                                                                                   |          |                |                  |                 | 6.9 <sup>Iso,7</sup>                  | 8   | 25            | 11                     | regional (300)        | [110]                 |
|                                                                                   |          |                |                  |                 | 1 <sup>Iso</sup>                      | 4   | 26            | 13                     | regional (na)         | Schmidt 2000 in [111] |
| <i>Pinus nigra</i>                                                                | Pinaceae | anemochorous   | monoecy, SI, ±SI | diploid, x = 12 | 9.8 <sup>Iso</sup>                    | 40  | 4.1           | 4                      | continental (4000)    | [112] <sup>s</sup>    |
|                                                                                   |          |                |                  |                 | cp 3.37 <sup>SSR</sup>                | 9   | 36            | 68 <sup>ha</sup>       | regional (250)        | [113]                 |

|                         |          |                |                        |                 |                                            |    |                           |                        |                          |                        |
|-------------------------|----------|----------------|------------------------|-----------------|--------------------------------------------|----|---------------------------|------------------------|--------------------------|------------------------|
|                         |          |                |                        |                 | 13.5 <sup>Iso</sup>                        | 28 | 53.4 (14–72)              | 4                      | continental (3600)       | [114] <sup>s</sup>     |
|                         |          |                |                        |                 | 6.0 <sup>Iso</sup>                         | 5  | na (80–100) <sup>20</sup> | 16 (15 <sup>Po</sup> ) | continental (1400)       | [115]                  |
| <i>Pinus pinea</i>      | Pinaceae | endozoochorous | monoecy                | diploid, x = 12 | 27.9 <sup>Iso</sup>                        | 17 | 34 (10–45)                | 31 (1 <sup>Po</sup> )  | continental (4000)       | [116]                  |
|                         |          |                |                        |                 | cp 3.32 <sup>SSR</sup>                     | 34 | 24                        | 4 <sup>ha</sup>        | continental (4000)       | [117]                  |
| <i>Pinus sylvestris</i> | Pinaceae | anemochorous   | monoecy, SC–<br>pSI, X | diploid, x = 12 | 3.5 <sup>Iso</sup> (G <sub>st</sub> )      | 5  | ≥40                       | 12                     | regional (100)           | [98]                   |
|                         |          |                |                        |                 | n 5.8 <sup>SSR</sup>                       | 21 | 21.3                      | 9                      | country (500)            | [118]                  |
|                         |          |                |                        |                 | 2.3 <sup>Iso</sup>                         | 18 | 32.5                      | 21                     | continental (5000)       | [119]                  |
|                         |          |                |                        |                 | 1.0 <sup>Iso</sup>                         | 3  | c. 45                     | 9                      | regional (1)             | [120] <sup>s</sup>     |
|                         |          |                |                        |                 | 2.0 <sup>Iso</sup>                         | 9  | 60 (40–121)               | 11                     | country (700)            | [121] <sup>s</sup>     |
|                         |          |                |                        |                 | 2.0 <sup>Iso</sup>                         | 4  | 250 (100–450)             | 10                     |                          |                        |
|                         |          |                |                        |                 | n 2.0 <sup>RFLP</sup>                      | 5  | 20.8 (17–23)              | 3                      |                          |                        |
|                         |          |                |                        |                 | n 14 <sup>RFLP</sup>                       | 4  | 24.3 (18–30)              | 13 <sup>ph</sup>       | country (2200)           | [122]                  |
|                         |          |                |                        |                 | n 1.4 <sup>SSR</sup>                       | 2  | 23 (20–26)                | 2                      |                          |                        |
|                         |          |                |                        |                 | n 33 <sup>SSR</sup> (Φ)                    | 10 | 9.3 (4–13)                | 43 <sup>Po</sup>       | country (400)            | [123]                  |
|                         |          |                |                        |                 | 5.9 <sup>Iso,7</sup>                       | 3  | 24 (20–28)                | 15 (13 <sup>Po</sup> ) | continental (2000)       | [109]                  |
|                         |          |                |                        |                 | 7.6 <sup>Iso</sup>                         | 6  | c.25 (19–30)              | 8                      | country (600)            | [124] <sup>s</sup>     |
|                         |          |                |                        |                 | 16.0 <sup>Iso</sup>                        | 19 | c. 30 (10–35)             | 3                      | continental (5000)       | [125] <sup>s</sup>     |
|                         |          |                |                        |                 | 2.0 <sup>Iso</sup>                         | 9  | 120                       | 10                     | regional (250)           | [126,127] <sup>s</sup> |
|                         |          |                |                        |                 | 0.6 <sup>Iso</sup> (G <sub>st</sub> )      | 3  | 133.7 (133–134)           | 14                     | regional (280)           | [128]                  |
|                         |          |                |                        |                 | cp 4.9 <sup>SSR</sup>                      | 12 | 36                        | 134 <sup>ha</sup>      | regional (250)           | [129]                  |
|                         |          |                |                        |                 | 1.7 <sup>Iso,7</sup>                       | 6  | 25                        | 11                     | regional (280)           | [110]                  |
|                         |          |                |                        |                 | cp 8.81 <sup>SSR</sup> (Φ <sub>st</sub> )  | 15 | 34.3 (17–48)              | 133 <sup>ha</sup>      | continental (3000)       |                        |
|                         |          |                |                        |                 | cp 3.24 <sup>SSR</sup> (Φ <sub>st</sub> )  | 15 | 47.1 (47–48)              | 174 <sup>ha</sup>      | regional (200)           | [130]                  |
|                         |          |                |                        |                 | 7.0 <sup>Iso</sup> (G <sub>st</sub> )      | 13 | 21.0 (12–30)              |                        | subcontinental<br>(2600) |                        |
|                         |          |                |                        |                 | 7.6 <sup>Iso</sup> (G <sub>st</sub> )      | 7  | 21.9 (12–30)              | 8                      | subcontinental<br>(2500) | [131]                  |
|                         |          |                |                        |                 | 3.5 <sup>Iso</sup> (G <sub>st</sub> )      | 6  | 21.2 (12–30)              |                        | subcontinental<br>(1600) |                        |
|                         |          |                |                        |                 | 2.5 <sup>Iso</sup> (G <sub>st</sub> )      | 16 | 31.4 (29–51)              | 7                      | continental (2200)       |                        |
|                         |          |                |                        |                 | 4.0 <sup>Iso</sup> (G <sub>st</sub> )      | 7  | 74 (40–112)               | 7                      | country (700)            | [132]                  |
|                         |          |                |                        |                 | 3.3 <sup>Iso</sup> (G <sub>st</sub> )      | 7  | 74 (40–112)               | 11                     | country (700)            |                        |
|                         |          |                |                        |                 | 2.1 <sup>Iso</sup> (G <sub>st</sub> )      | 2  | 55.5 (40–71)              |                        | regional (120)           |                        |
|                         |          |                |                        |                 | 3.8 <sup>Iso</sup> (G <sub>st</sub> )      | 14 | 40.6 (18–62)              | 11                     | country (700)            | [133]                  |
|                         |          |                |                        |                 | 4.2 <sup>Iso</sup> (G <sub>st</sub> )      | 16 | 42.5 (18–71)              |                        | country (1000)           |                        |
|                         |          |                |                        |                 | 2.6 <sup>Iso</sup> (G <sub>st</sub> )      | 8  | 32 (20–75)                | 14 (12 <sup>Po</sup> ) | country (500)            | [134]                  |
|                         |          |                |                        |                 | cp 3.1 <sup>SSR</sup> (Φ <sub>st</sub> )   | 13 | 24.8                      | 139 <sup>ha</sup>      | regional (350)           | [135]                  |
|                         |          |                |                        |                 | 3.0 <sup>Iso</sup>                         | 3  | 104 (39–141)              | 3                      | country (1000)           | [136] <sup>s</sup>     |
|                         |          |                |                        |                 | cp 2.1 <sup>SSR</sup> (R <sub>st</sub> )   | 38 | 22.1 (14–24)              | 152 <sup>ha</sup>      | continental (4300)       | [137]                  |
|                         |          |                |                        |                 | mt 37–81.3 <sup>RFLP</sup>                 | 38 | ≥30                       | 4 <sup>ha</sup>        | continental (4000)       | [138]                  |
|                         |          |                |                        |                 | mt 84.5 <sup>RFLP</sup> (Φ <sub>st</sub> ) | 23 | 32.5 (15–47)              | 2 <sup>ha</sup>        | continental (3000)       |                        |
|                         |          |                |                        |                 | mt 59.6 <sup>RFLP</sup> (Φ <sub>st</sub> ) | 12 | 29.3 (27–30)              |                        | country (700)            | [139]                  |

|                                                                                |            |                |                |                 |                                                                                         |                 |                              |                                         |                       |                         |
|--------------------------------------------------------------------------------|------------|----------------|----------------|-----------------|-----------------------------------------------------------------------------------------|-----------------|------------------------------|-----------------------------------------|-----------------------|-------------------------|
|                                                                                |            |                |                |                 | 12.3 <sup>iso</sup> (Dj)                                                                | 10              | 88                           | 14                                      | subcontinental (2500) | [140]                   |
| <i>Populus alba</i>                                                            | Salicaceae | anemochorous   | dioecy, X      | diploid, x = 19 | cp 30.2 <sup>RFLP,7</sup><br>cp 45.1 <sup>SSR,7</sup>                                   | 3               | 5.3 (4–7)                    | 2 <sup>ha</sup><br>4 <sup>ha</sup>      | regional (370)        | [141]                   |
|                                                                                |            |                |                |                 | n 2.76–3.81 <sup>SSR</sup>                                                              | 3 <sup>16</sup> | 51.3 (49–53)                 | 5                                       | country (500)         | [142]                   |
| <i>Populus nigra</i>                                                           | Salicaceae | anemochorous   | dioecy, X      | diploid, x = 19 | n 2.95 <sup>SSR</sup>                                                                   | 12              | 28.6 (26–31)                 | 8                                       | continental (1300)    | [143]                   |
|                                                                                |            |                |                |                 | 3.6 <sup>iso</sup>                                                                      | na              | na                           | 8                                       | country (500)         | [144]                   |
|                                                                                |            |                |                |                 | n 8.1 <sup>SSR</sup><br>26.8 <sup>AFLP</sup>                                            | 17              | 30                           | 7<br>105 <sup>po</sup>                  | continental (2100)    | [145]                   |
| <i>Populus tremula</i>                                                         | Salicaceae | anemochorous   | dioecy, X      | diploid, x = 19 | cp 11.9 <sup>RFLP</sup> (G <sub>st</sub> )<br>cp 12.8 <sup>SSR</sup> (G <sub>st</sub> ) | 30              | 9 (3–12)                     | 21 <sup>ha</sup><br>15 <sup>ha</sup>    | continental (4700)    | [141]                   |
|                                                                                |            |                |                |                 | cp 11.0 <sup>RFLP</sup> (G <sub>st</sub> )                                              | 30              | 7.9                          | 31 <sup>ha</sup>                        | na                    | Bittkau<br>2002 in [63] |
|                                                                                |            |                |                |                 | n 1.5 <sup>SSR</sup><br>n 1.6 <sup>SNP</sup>                                            | 12              | 9.7 (6–10)                   | 18<br>50                                | country (1000)        | [146]                   |
|                                                                                |            |                |                |                 | cp 11.0 <sup>RFLP</sup> (G <sub>st</sub> )                                              | 23              | 9.4                          | 30 <sup>ha</sup>                        | continental (3600)    | [25]                    |
|                                                                                |            |                |                |                 | n 55 <sup>ISSR</sup>                                                                    | 7               | 32                           | 119 <sup>mo</sup> ,<br>87 <sup>po</sup> | regional (270)        | [147]                   |
|                                                                                |            |                |                |                 | n 51.3 <sup>ISSR</sup> (G <sub>st</sub> )                                               | 6               | 29                           | 119 <sup>mo</sup> ,<br>87 <sup>po</sup> | regional (235)        | [148]                   |
| <i>Quercus cerris</i>                                                          | Fagaceae   | endozoochorous | monoecy, SI, X | diploid, x = 12 | 10.7 <sup>iso</sup>                                                                     | 2               | na                           | 14 (7 <sup>po</sup> )                   | regional (5)          | [149]                   |
| <i>Quercus crenata</i>                                                         | Fagaceae   | endozoochorous | monoecy        | diploid, x = 12 |                                                                                         |                 |                              |                                         |                       |                         |
| <i>Quercus frainetto</i>                                                       | Fagaceae   | endozoochorous | monoecy        | diploid, x = 12 | cp 45.7 <sup>RFLP</sup> (G <sub>st</sub> )                                              | 23              | 4.77                         | 9 <sup>ha</sup>                         | continental (900)     | [150]                   |
| <i>Quercus ilex</i>                                                            | Fagaceae   | endozoochorous | monoecy        | diploid, x = 12 | n 1.67 <sup>AFLP</sup>                                                                  | 68              | 9.3 (2–20)                   | 215 <sup>mo</sup>                       | country (1000)        | [151]                   |
|                                                                                |            |                |                |                 | 18.6 <sup>iso</sup> Shannon-Weaver                                                      | 30              | 36                           | 5                                       | continental (3000)    | [152]                   |
|                                                                                |            |                |                |                 | 10.2 <sup>iso</sup> (G <sub>st</sub> )                                                  | 57              | 34.1 (15–59)                 | 6 (5 <sup>po</sup> ) <sup>6</sup>       | continental (3200)    | [153]                   |
|                                                                                |            |                |                |                 | 10.0 <sup>iso</sup> (G <sub>st</sub> )                                                  | 22              | 34.7 (15–50)                 | 8 (7 <sup>po</sup> ) <sup>6</sup>       | continental (3000)    |                         |
|                                                                                |            |                |                |                 | 7.3 <sup>iso</sup>                                                                      | 16              | 51 (27–158)                  | 3                                       | continental (2000)    | [154]                   |
| <i>Quercus petraea</i><br>(incl. <i>Q. dalechampii</i> , <i>Q. polycarpa</i> ) | Fagaceae   | endozoochorous | monoecy, SI, X | diploid, x = 12 | n 2.3 <sup>SSR</sup><br>cp 50.35 <sup>RFLP</sup>                                        | 12              | 24.6 (10–40)                 | 16<br>3 <sup>ha</sup>                   | regional (100)        | [155]                   |
|                                                                                |            |                |                |                 | 0.056 <sup>iso,14</sup> (d <sub>o</sub> )<br>cp 1.2 <sup>RFLP</sup>                     | 12              | 100<br>≥5                    | 17<br>2 <sup>ha</sup>                   | regional (230)        | [156]                   |
|                                                                                |            |                |                |                 | cp 71.3 <sup>RFLP</sup> (G <sub>st</sub> )                                              | 25              | >3 (incl. <i>Qu. robur</i> ) | 2 <sup>ha</sup>                         | country (400)         | [157]                   |
|                                                                                |            |                |                |                 | 2.4 <sup>iso</sup> (G <sub>st</sub> )                                                   | 32              | 120 <sup>13</sup>            | 15 (11 <sup>po</sup> )                  | country (950)         | [158]                   |
|                                                                                |            |                |                |                 | 2.4 <sup>iso</sup>                                                                      | 93              | 120                          | 8                                       | continental (2300)    | [159]                   |
|                                                                                |            |                |                |                 | cp 80.2 <sup>RFLP</sup>                                                                 | 34              | 5                            | 7 <sup>ha</sup>                         | country (400)         | [160]                   |
|                                                                                |            |                |                |                 | n 0.8 <sup>SSR</sup><br>cp 50.1 <sup>RFLP</sup> (G <sub>st</sub> )                      | 7               | 29.9 (25–33)<br>5.7          | 13<br>3 <sup>ha</sup>                   | country (400)         | [161]                   |
|                                                                                |            |                |                |                 | 3.6 <sup>iso</sup>                                                                      | 5               | 155 (72–228)                 | 13                                      | regional (300)        | [56] <sup>8</sup>       |
|                                                                                |            |                |                |                 | cp 76.9 <sup>SSR</sup>                                                                  | 31              | >3                           | 12 <sup>ha</sup>                        | regional (250)        | [162]                   |

|                                                           |          |                |                      |                 |                                                       |                 |                 |                        |                       |                           |
|-----------------------------------------------------------|----------|----------------|----------------------|-----------------|-------------------------------------------------------|-----------------|-----------------|------------------------|-----------------------|---------------------------|
|                                                           |          |                |                      |                 | n 4.9 <sup>SSR</sup>                                  | 3               | 48              | 20                     | subcontinental (1500) | [163]                     |
|                                                           |          |                |                      |                 | cp 83.5 <sup>RFLP</sup> ( <i>G<sub>st</sub></i> )     | 650             | 4.23            | 17 <sup>ha</sup>       | continental (3400)    | [150]                     |
|                                                           |          |                |                      |                 | 3.2 <sup>Iso</sup> ( <i>G<sub>st</sub></i> )          | 7               | 122.1 (115–142) | 13 (10 <sup>Po</sup> ) | continental (2300)    | [111,164]                 |
|                                                           |          |                |                      |                 | cp 90.5 <sup>RFLP</sup>                               | 58              | 8.1             | 3 <sup>ha</sup>        | subcontinental (2000) | [165]                     |
|                                                           |          |                |                      |                 | 13.5 <sup>Iso</sup>                                   | 8 <sup>21</sup> | na              | 14 (8 <sup>Po</sup> )  | regional (120)        | [149]                     |
|                                                           |          |                |                      |                 | cp 72.4 <sup>RFLP</sup> ( <i>G<sub>st</sub></i> )     | 16              | >3              | 7 <sup>ha</sup>        | country (700)         | [166]                     |
|                                                           |          |                |                      |                 | 1.7 <sup>Iso</sup>                                    | 32              | 120             | 15                     | subcontinental (na)   | Zanetto & Kremer in [167] |
|                                                           |          |                |                      |                 | 2.5 <sup>Iso</sup> ( <i>G<sub>st</sub></i> )          | 81              | 120             | 13 (8 <sup>Po</sup> )  | continental (2700)    | [168]                     |
| <i>Quercus pubescens</i><br>(incl. <i>Q. virgiliana</i> ) | Fagaceae | endozoochorous | monoecy              | diploid, x = 12 | cp 87.6 <sup>RFLP</sup> ( <i>G<sub>st</sub></i> )     | 36              | 3.3 (1–6)       | 6 <sup>ha</sup>        | country (770)         | [169]                     |
|                                                           |          |                |                      |                 | 3 <sup>Iso</sup> ( <i>G<sub>st</sub></i> )            | 7               | 100             | 17                     | regional (200)        | [156], cf. [111]          |
|                                                           |          |                |                      |                 | cp 2.7 <sup>RFLP</sup>                                |                 | ≥5              | 2 <sup>ha</sup>        |                       |                           |
|                                                           |          |                |                      |                 | cp 86.9 <sup>SSR</sup>                                | 6               | >3              | 4 <sup>ha</sup>        | regional (250)        | [162]                     |
|                                                           |          |                |                      |                 | cp 85.4 <sup>RFLP</sup> ( <i>G<sub>st</sub></i> )     | 331             | 4.37            | 13 <sup>ha</sup>       | continental (1900)    | [150]                     |
|                                                           |          |                |                      |                 | cp 76.9 <sup>RFLP</sup> ( <i>G<sub>st</sub></i> )     | 11              | 7.36            | 3 <sup>ha</sup>        | subcontinental (2000) | [165]                     |
|                                                           |          |                |                      |                 | 13 <sup>Iso</sup>                                     | 3               | na              | 14 (8 <sup>Po</sup> )  | regional (50)         | [149]                     |
|                                                           |          |                |                      |                 | cp 83.0 <sup>RFLP</sup>                               | 37              | >3              | 6 <sup>ha</sup>        | country (700)         | [166]                     |
| <i>Quercus robur</i><br>(incl. <i>Q. pedunculiflora</i> ) | Fagaceae | endozoochorous | monoecy,<br>gamSI, X | diploid, x = 12 | n 5.1 <sup>SSR</sup>                                  | 12              | 20              | 4                      | country (240)         | [170]                     |
|                                                           |          |                |                      |                 | 0.057 <sup>Iso,14</sup> ( <i>d<sub>o</sub></i> )      | 6               | 100             | 17                     | regional (200)        | [156]                     |
|                                                           |          |                |                      |                 | cp 1.9 <sup>RFLP</sup>                                |                 | ≥5              | 2 <sup>ha</sup>        |                       |                           |
|                                                           |          |                |                      |                 | cp 58.9 <sup>SSR+RFLP</sup> ( <i>G<sub>st</sub></i> ) | 24              | 20              | 5 <sup>ha</sup>        | regional (200)        | [171]                     |
|                                                           |          |                |                      |                 | 8.4 <sup>Iso</sup> ( <i>δ</i> )                       | 15              | 43.3            | 7                      | regional (250)        | [172]                     |
|                                                           |          |                |                      |                 | cp 71.8 <sup>RFLP</sup> ( <i>G<sub>st</sub></i> )     | 25              | >3              | 2 <sup>ha</sup>        | country (400)         | [157]                     |
|                                                           |          |                |                      |                 | 5.0 <sup>Iso</sup>                                    | 28              | na (40–50)      | 12                     | country (na)          | [173]                     |
|                                                           |          |                |                      |                 | 6.6 <sup>Iso</sup>                                    | 33              | 48.1 (16–130)   | 13 (12 <sup>Po</sup> ) | regional (180)        | [174,175]                 |
|                                                           |          |                |                      |                 | cp 75.4 <sup>RFLP</sup> ( <i>G<sub>st</sub></i> )     | 27              | 5               | 7 <sup>ha</sup>        | country (400)         | [160]                     |
|                                                           |          |                |                      |                 | 1.8 <sup>Iso</sup>                                    | 5               | 166 (96–208)    | 13                     | country (500)         | [56] <sup>8</sup>         |
|                                                           |          |                |                      |                 | cp 48.6 <sup>SSR</sup>                                | 53              | >3              | 11 <sup>ha</sup>       | regional (250)        | [162]                     |
|                                                           |          |                |                      |                 | cp 71.7 <sup>RFLP</sup> ( <i>G<sub>st</sub></i> )     | 41              | >3              | 6 <sup>ha</sup>        | country (700)         | [162]                     |
|                                                           |          |                |                      |                 | n 3.9 <sup>SSR</sup>                                  | 3               | 48              | 20                     | subcontinental (1600) | [163]                     |
|                                                           |          |                |                      |                 | cp 103.4 <sup>RFLP</sup> ( <i>G<sub>st</sub></i> )    | 984             | 4.29            | 23 <sup>ha</sup>       | continental (5400)    | [150]                     |
|                                                           |          |                |                      |                 | 2.4 <sup>Iso</sup> ( <i>G<sub>st</sub></i> )          | 7               | 115.4 (76–127)  | 13 (9 <sup>Po</sup> )  | continental (2000)    | [111,164]                 |
|                                                           |          |                |                      |                 | cp 92.5 <sup>RFLP</sup> ( <i>G<sub>st</sub></i> )     | 22              | 7.77            | 3 <sup>ha</sup>        | subcontinental (2000) | [165]                     |

|                                                    |             |                |                             |                    |                                                                                         |                 |               |                                      |                          |                             |
|----------------------------------------------------|-------------|----------------|-----------------------------|--------------------|-----------------------------------------------------------------------------------------|-----------------|---------------|--------------------------------------|--------------------------|-----------------------------|
|                                                    |             |                |                             |                    | 17.0 <sup>Iso</sup>                                                                     | 6 <sup>19</sup> | na            | 14 (11 <sup>Po</sup> )               | regional (170)           | [149]                       |
|                                                    |             |                |                             |                    | 7.93 <sup>AFLP</sup>                                                                    | 12              | 25 (16–29)    | 100 (76 <sup>Po</sup> )<br>6         | regional (200)           | [176]                       |
|                                                    |             |                |                             |                    | cp 63.4 <sup>RFLP</sup> (G <sub>st</sub> )                                              |                 | 25.2 (16–30)  | 4 <sup>ha</sup>                      |                          |                             |
| <i>Taxus baccata</i>                               | Taxaceae    | endozoochorous | dioecy, X                   | diploid, x = 12    | 19.7 <sup>Iso,7</sup> (δ 19.5)                                                          | 6               | 38.8 (9–58)   | 6                                    | regional (80)            | [177]                       |
|                                                    |             |                |                             |                    | 7.6 <sup>Iso</sup>                                                                      | 7               | 89 (40–122)   | 9                                    | regional (230)           | [178,179]                   |
|                                                    |             |                |                             |                    | n 15.5 <sup>SSR</sup>                                                                   | 51              | 18.1          | 7                                    | continental (1600)       | [180]                       |
|                                                    |             |                |                             |                    | 4 <sup>Iso</sup>                                                                        | 8               | 7.3 (2–13)    | 7                                    | regional (200)           | [181]                       |
|                                                    |             |                |                             |                    | n 18.8 <sup>SSR</sup>                                                                   | 41              | 27.3 (9–40)   | 7                                    | continental (4100)       | [182]                       |
|                                                    |             |                |                             |                    | 10.4 <sup>Iso,7</sup>                                                                   | 4               | 22.8 (12–33)  | 8                                    | country (500)            | [183]                       |
|                                                    |             |                |                             |                    | 14.7 <sup>Iso,7</sup>                                                                   | 6               | 81.7 (46–114) | 6                                    | regional (250)           | [184]                       |
|                                                    |             |                |                             |                    | 16.6 <sup>Iso</sup>                                                                     | 10              | 46.1 (23–52)  | 13 (7 <sup>Po</sup> )                | regional (320)           | [185]                       |
| <b>insect-pollinated</b>                           |             |                |                             |                    |                                                                                         |                 |               |                                      |                          |                             |
| <i>Acer campestre</i>                              | Sapindaceae | anemochorous   | hermaphrodis<br>m, FS       | diploid, x = 13    | cp 79 <sup>RFLP</sup> (G <sub>st</sub> )<br>cp 59.4 <sup>SSR</sup> (G <sub>st</sub> )   | 18              | 10.3 (9–12)   | 12 <sup>ha</sup><br>12 <sup>ha</sup> | continental (2400)       | [141]                       |
|                                                    |             |                |                             |                    | cp 70 <sup>RFLP</sup> (G <sub>st</sub> )                                                | 18              | 10.2          | 19 <sup>ha</sup>                     | na                       | Bittkau<br>2002 in [63]     |
|                                                    |             |                |                             |                    | n 27 <sup>SSR</sup> (δ)                                                                 | 12              | 30.1          | 6                                    |                          |                             |
|                                                    |             |                |                             |                    | n 5.7 <sup>SSR,7</sup>                                                                  |                 | c. 30         | 3                                    | country (650)            | [186]                       |
|                                                    |             |                |                             |                    | cp 71 <sup>RFLP</sup> (G <sub>st</sub> )                                                | 16              | 10.3          | 14 <sup>ha</sup>                     | continental (2400)       | [25]                        |
| <i>Acer<br/>monspessulanum</i>                     | Sapindaceae | anemochorous   | hermaphrodis<br>m           | diploid, x = 13    | cp 87.3 <sup>RFLP</sup> (G <sub>st</sub> )<br>cp 68.1 <sup>SSR</sup> (G <sub>st</sub> ) | 9               | 8 (3–10)      | 6 <sup>ha</sup><br>6 <sup>ha</sup>   | continental (2300)       | [141]                       |
| <i>Acer opalus</i> (incl.<br><i>A. obtusatum</i> ) | Sapindaceae | anemochorous   | hermaphrodis<br>m           | diploid, x = 13    | cp 100 <sup>RFLP,7</sup><br>cp 28.5 <sup>SSR,7</sup>                                    | 5               | 3.4 (1–7)     | 3 <sup>ha</sup><br>2 <sup>ha</sup>   | country (550)            | [141]                       |
| <i>Acer platanoides</i>                            | Sapindaceae | anemochorous   | hermaphrodis<br>m, gamSI, X | diploid, x = 13    | cp 100 <sup>SSR,7</sup>                                                                 | 6               | 5.8 (1–10)    | 2 <sup>ha</sup>                      | continental (2500)       | [141]                       |
|                                                    |             |                |                             |                    | 9.9 <sup>Iso</sup>                                                                      | 12              | 38.0 (9–50)   | 11 (9 <sup>Po</sup> )                | subcontinental<br>(2000) | [27,28]                     |
|                                                    |             |                |                             |                    | 12 <sup>Iso</sup>                                                                       | 29              | 50.0 (4–102)  | 14 (9 <sup>Po</sup> )                | country (450)            | [187]                       |
| <i>Acer<br/>pseudoplatanus</i>                     | Sapindaceae | anemochorous   | hermaphrodis<br>m, FS       | tetraploid, x = 13 | 1.9 <sup>Iso</sup>                                                                      | 12              | 74.7 (53–78)  | 16                                   | regional (200)           | [188]                       |
|                                                    |             |                |                             |                    | cp 68.3 <sup>RFLP</sup> (G <sub>st</sub> )<br>cp 64.6 <sup>SSR</sup> (G <sub>st</sub> ) | 21              | 10.0 (6–13)   | 18 <sup>ha</sup><br>6 <sup>ha</sup>  | continental (2700)       | [141]                       |
|                                                    |             |                |                             |                    | cp 67 <sup>RFLP</sup> (G <sub>st</sub> )                                                | 21              | 9.7           | 22 <sup>ha</sup>                     | na                       | Bittkau<br>2002 in [63]     |
|                                                    |             |                |                             |                    | 4.0 <sup>Iso</sup> (G <sub>st</sub> )                                                   | 7               | na            | na                                   | na                       | Konnert<br>2004 in<br>[111] |
|                                                    |             |                |                             |                    | cp 66 <sup>RFLP</sup> (G <sub>st</sub> )                                                | 19              | 10.2          | 22 <sup>ha</sup>                     | continental (2800)       | [25]                        |
| <i>Acer tataricum</i>                              | Sapindaceae | anemochorous   | hermaphrodis<br>m           | diploid, x = 13    |                                                                                         |                 |               |                                      |                          |                             |
| <i>Arbutus unedo</i>                               | Ericaceae   | endozoochorous | hermaphrodis<br>m           | diploid, x = 13    | n 8.3 <sup>AFLP</sup>                                                                   | 19              | 24.5 (20–27)  | 125 <sup>Po</sup>                    | continental (3200)       | [189]                       |

|                                                                    |          |                              |                             |                                     |                                            |    |                 |                                          |                          |                  |
|--------------------------------------------------------------------|----------|------------------------------|-----------------------------|-------------------------------------|--------------------------------------------|----|-----------------|------------------------------------------|--------------------------|------------------|
| <i>Cercis siliquastrum</i>                                         | Fabaceae | autochorous<br>(barochorous) | hermaphrodis<br>m           | diploid, x = 7                      |                                            |    |                 |                                          |                          |                  |
| <i>Fraxinus ornus</i>                                              | Oleaceae | anemochorous                 | androdioecy,<br>±SC, FX     | diploid, x = 23                     | cp 96.7 <sup>SSR</sup> (G <sub>st</sub> )  | 59 | 6.2 (4–11)      | 4 <sup>ha</sup>                          | continental (2500)       | [61]             |
| <i>Malus sylvestris</i><br>(incl. <i>M.</i><br><i>dasyphylla</i> ) | Rosaceae | endozoochorous               | hermaphrodis<br>m, gamSI, X | diploid, x = 17                     | n 6.0 <sup>SSR</sup>                       | 5  | 14.6 (6–28)     | 12                                       | country (500)            | [190]            |
|                                                                    |          |                              |                             |                                     | 4.6 <sup>AFLP</sup>                        | 4  | 18 (6–28)       | 139<br>(126 <sup>Po</sup> ) <sup>6</sup> |                          |                  |
|                                                                    |          |                              |                             |                                     | n 10.0 <sup>SSR</sup>                      | 37 | 10.3 (1–100)    | 26                                       | continental (3400)       | [191]            |
| <i>Prunus avium</i>                                                | Rosaceae | endozoochorous               | hermaphrodis<br>m, gamSI, X | diploid, x = 8                      | n 4.6 <sup>SSR</sup>                       | 11 | 25.3 (14–39)    | 8                                        | country (500)            | [192]            |
|                                                                    |          |                              |                             |                                     | 4.9 <sup>Iso</sup>                         | 4  | 43.8 (14–81)    | 10                                       | country (600)            | [193]            |
|                                                                    |          |                              |                             |                                     | n 5.3 <sup>SSR</sup>                       | 4  | 32.8 (31–36)    | 10                                       | country (170)            | [194]            |
|                                                                    |          |                              |                             |                                     | 1.4 <sup>Iso</sup>                         | 2  | 69.5 (47–92)    | 14 (8 <sup>Po</sup> )                    | regional (na)            | [195]            |
|                                                                    |          |                              |                             |                                     | 5.2 <sup>Iso</sup>                         | 6  | 35.2 (15–92)    |                                          | country (500)            |                  |
|                                                                    |          |                              |                             |                                     | cp 29 <sup>RFLP</sup>                      | 23 | 9.2 (3–15)      | 16 <sup>ha</sup>                         | continental (2300)       | [196]            |
|                                                                    |          |                              |                             |                                     | cp 29.0 <sup>RFLP</sup> (G <sub>st</sub> ) | 23 | 9.2             | 16 <sup>ha</sup>                         | continental (2800)       | [25]             |
| <i>Prunus mahaleb</i>                                              | Rosaceae | endozoochorous               | hermaphrodis<br>m           | diploid, x = 8                      | n 19.35 <sup>RAPD</sup>                    | 7  | 20.6 (11–32)    | 73 <sup>Po</sup>                         | regional (15)            | [197]            |
| <i>Prunus padus</i>                                                | Rosaceae | endozoochorous               | hermaphrodis<br>m           | tetraploid, x = 8                   |                                            |    |                 |                                          |                          |                  |
| <i>Pyrus communis</i><br>(incl. <i>P. pyrastrer</i> )              | Rosaceae | endozoochorous               | hermaphrodis<br>m, gamSI, X | diploid, x = 17                     | n 4 <sup>SSR</sup> (Φ)                     | 6  | 32.0 (29–36)    | 17                                       | country (500)            | [198]            |
| <i>Pyrus nivalis</i> (incl.<br><i>P. austriaca</i> )               | Rosaceae | endozoochorous               | hermaphrodis<br>m           | diploid, x = 17                     |                                            |    |                 |                                          |                          |                  |
| <i>Sorbus aria</i> group <sup>9</sup>                              | Rosaceae | endozoochorous               | hermaphrodis<br>m           | di-, tri- and<br>tetraploid, x = 17 | cp 25 <sup>RFLP</sup> (G <sub>st</sub> )   | 10 | 5.9             | 25 <sup>ha</sup>                         | na                       | Musch in<br>[63] |
| <i>Sorbus aucuparia</i>                                            | Rosaceae | endozoochorous               | hermaphrodis<br>m, gamSI, X | diploid, x = 17                     | cp 28.6 <sup>RFLP</sup>                    | 6  | 25.0 (30–50)    | 12 <sup>ha</sup>                         | subcontinental<br>(1000) | [199]            |
|                                                                    |          |                              |                             |                                     | 6 <sup>Iso</sup> (G <sub>st</sub> )        | 17 | 37.9 (25–41)    | 9                                        | country (500)            | [200]            |
|                                                                    |          |                              |                             |                                     | 4.3 <sup>Iso</sup> (θ)                     | 8  | 13.1 (2–26)     | 6                                        | regional (4)             | [201]            |
|                                                                    |          |                              |                             |                                     | cp 13.1 <sup>RFLP</sup> (θ)                |    | 14.9 (2–23)     | 4 <sup>ha</sup>                          |                          |                  |
| <i>Sorbus domestica</i>                                            | Rosaceae | endozoochorous               | hermaphrodis<br>m, SC, M    | diploid, x = 17                     | n 13.8 <sup>SSR,17</sup>                   | 13 | 22.1 (11–45)    | 7                                        | continental (3600)       | [202]            |
|                                                                    |          |                              |                             |                                     | n 29.2 <sup>SSR,7,17</sup>                 | 6  | 5.2 (2–14)      | 7                                        | regional (220)           | [203]            |
| <i>Sorbus latifolia</i><br>group <sup>10</sup>                     | Rosaceae | endozoochorous               | hermaphrodis<br>m           | di-, tri- and<br>tetraploid, x = 17 |                                            |    |                 |                                          |                          |                  |
| <i>Sorbus intermedia</i><br>group <sup>11</sup>                    | Rosaceae | endozoochorous               | hermaphrodis<br>m           | di-, tri- and<br>tetraploid, x = 17 |                                            |    |                 |                                          |                          |                  |
| <i>Sorbus torminalis</i>                                           | Rosaceae | endozoochorous               | hermaphrodis<br>m           | di- and<br>tetraploid, x = 17       | n 10.7 <sup>ISSR</sup> (Φ <sub>st</sub> )  | 26 | 22 (11–24)<br>8 | 54 <sup>Po</sup><br>10 <sup>ha</sup>     | regional (280)           | [204]            |
|                                                                    |          |                              |                             |                                     | cp 37.0 <sup>RFLP</sup> (Φ <sub>st</sub> ) |    |                 |                                          |                          |                  |
|                                                                    |          |                              |                             |                                     | 15 <sup>Iso</sup>                          | 67 | 17.7 (11–26)    | 15 (9 <sup>Po</sup> )                    | country (900)            | [205]            |
|                                                                    |          |                              |                             |                                     | 15 <sup>Iso</sup>                          | 73 | 20 (11–86)      | 15                                       | continental (2500)       |                  |
|                                                                    |          |                              |                             |                                     | 6.7 <sup>Iso,17</sup>                      | 10 | 70.8 (13–143)   | 6                                        | regional (100)           | [206]            |
|                                                                    |          |                              |                             |                                     | n 22.8 <sup>SSR</sup>                      | 14 | 20.2 (9–41)     | 7                                        | continental (2700)       | [207]            |

|                                                 |            |                |                         |                            |                                            |       |               |                                    |                       |           |
|-------------------------------------------------|------------|----------------|-------------------------|----------------------------|--------------------------------------------|-------|---------------|------------------------------------|-----------------------|-----------|
|                                                 |            |                |                         |                            | cp 34 <sup>RFLP</sup>                      | 55    | 16 (10–31)    | 25 <sup>ha</sup>                   | country (900)         | [208]     |
|                                                 |            |                |                         |                            | cp 33 <sup>RFLP</sup> (G <sub>st</sub> )   | 17    | 8.7           | 26 <sup>ha</sup>                   | continental (2400)    | [25]      |
| <b>mixed</b>                                    |            |                |                         |                            |                                            |       |               |                                    |                       |           |
| <i>Castanea sativa</i>                          | Fagaceae   | endozoochorous | monoecy, SC–SI, X       | diploid, x = 12            | cp 43 <sup>RFLP</sup>                      | 38    | 4.8 (3–5)     | 11 <sup>ha</sup>                   | continental (4200)    | [209]     |
|                                                 |            |                |                         |                            | 15 <sup>Iso</sup>                          | 17    | 30.1 (27–37)  | 13 (11 <sup>Po</sup> )             | country (900)         | [210]     |
|                                                 |            |                |                         |                            | 2.7 <sup>Iso</sup>                         | 5     | 49.6 (15–117) | 10                                 | country (600)         | [193]     |
|                                                 |            |                |                         |                            | n 14.5 <sup>SSR</sup>                      | 16    | 14.9 (11–21)  | 6                                  | country (950)         | [211]     |
|                                                 |            |                |                         |                            | 10.0 <sup>Iso</sup>                        | 18    | 15.9 (10–24)  | 15 (10 <sup>Po</sup> )             | country (800)         | [212,213] |
|                                                 |            |                |                         |                            | 8.7 <sup>Iso</sup>                         | 15    |               |                                    | country (900)         |           |
|                                                 |            |                |                         |                            | 4.5 <sup>Iso</sup>                         | 6     | na (20–60)    | 13 (7 <sup>Po</sup> ) <sup>6</sup> | regional (80)         | [214]     |
|                                                 |            |                |                         |                            | 8.8 <sup>Iso</sup>                         | 7     |               |                                    | regional (50)         |           |
|                                                 |            |                |                         |                            | 0.8 <sup>Iso</sup>                         | 2     |               |                                    | regional (80)         |           |
| <i>Celtis australis</i>                         | Ulmaceae   | endozoochorous | andromonoecy            | di- and tetraploid, x = 10 |                                            |       |               |                                    |                       |           |
| <i>Salix alba</i>                               | Salicaceae | anemochorous   | dioecy, X               | tetraploid, x = 19         |                                            |       |               |                                    |                       |           |
| <i>Salix caprea</i>                             | Salicaceae | anemochorous   | dioecy, X               | diploid, x = 19            | cp 9.0 <sup>RFLP</sup> (G <sub>st</sub> )  | 24    | 10 (8–13)     | 28 <sup>ha</sup>                   | continental (2400)    | [29]      |
|                                                 |            |                |                         |                            | cp 1.7 <sup>SSR</sup> (G <sub>st</sub> )   | 5     | 10 (8–10)     | 8 <sup>ha</sup>                    |                       |           |
|                                                 |            |                |                         |                            | n 7 <sup>SSR</sup> (G <sub>st</sub> )      |       |               | 6                                  | regional (230)        | [215]     |
|                                                 |            |                |                         |                            | cp 38 <sup>SSR</sup> (G <sub>st</sub> )    | 21    | 8.7 (7–23)    | 79 <sup>ha</sup>                   |                       |           |
|                                                 |            |                |                         |                            | cp 9 <sup>RFLP</sup> (G <sub>st</sub> )    | 25    | 10            | 29 <sup>ha</sup>                   | continental (3600)    | [25]      |
| <i>Salix daphnoides</i>                         | Salicaceae | anemochorous   | dioecy, X               | diploid, x = 19            |                                            |       |               |                                    |                       |           |
| <i>Salix eleagnos</i>                           | Salicaceae | anemochorous   | dioecy, X               | diploid, x = 19            |                                            |       |               |                                    |                       |           |
| <i>Salix euxina</i> (incl. <i>S. fragilis</i> ) | Salicaceae | anemochorous   | dioecy, X               | tetraploid, x = 19         |                                            |       |               |                                    |                       |           |
| <i>Salix pentandra</i>                          | Salicaceae | anemochorous   | dioecy, X               | tetraploid, x = 19         |                                            |       |               |                                    |                       |           |
|                                                 |            |                |                         |                            | n 11.9 <sup>SSR</sup>                      | 38    | 1.9           |                                    | continental (6700)    |           |
|                                                 |            |                |                         |                            | n 9.7 <sup>SSR</sup>                       | c. 54 | c. 2.9        |                                    | continental (6300)    |           |
|                                                 |            |                |                         |                            | n 11.2 <sup>SSR</sup>                      | na    | na            |                                    | continental (5600)    |           |
| <i>Salix viminalis</i>                          | Salicaceae | anemochorous   | dioecy, X               | diploid, x = 19            | n 6.0 <sup>SSR</sup>                       | c. 64 | c. 2.9        | 33                                 | subcontinental (1800) | [216]     |
|                                                 |            |                |                         |                            | n 4.9 <sup>SSR</sup>                       | na    | na            |                                    | subcontinental (1750) |           |
|                                                 |            |                |                         |                            | n 4.0 <sup>SSR</sup>                       | na    | na            |                                    | subcontinental (1650) |           |
|                                                 |            |                |                         |                            | n 4.1 <sup>Iso</sup>                       | 14    | 12.2 (5–158)  | 15 (6 <sup>Po</sup> )              | subcontinental (1100) | [217]     |
|                                                 |            |                |                         |                            | n 5.0 <sup>SSR</sup>                       | 6     | 12.8 (5–22)   | 38                                 | regional (270)        | [218]     |
| <i>Tilia cordata</i>                            | Malvaceae  | anemochorous   | hermaphroditism, SI, FX | diploid, x = 41            | cp 55.2 <sup>RFLP</sup> (G <sub>st</sub> ) | 17    | 7.6 (2–10)    | 14 <sup>ha</sup>                   | continental (2400)    | [219]     |
|                                                 |            |                |                         |                            | n 7.8 <sup>SSR</sup>                       | 16    | 15.4 (5–31)   | 13                                 | regional (500)        | [220]     |
|                                                 |            |                |                         |                            | cp 57 <sup>RFLP</sup> (G <sub>st</sub> )   | 16    | 7.6           | 16 <sup>ha</sup>                   | continental (3000)    | [25]      |

|                                                  |           |              |                             |                 |                                      |    |             |                  |                  |                                |
|--------------------------------------------------|-----------|--------------|-----------------------------|-----------------|--------------------------------------|----|-------------|------------------|------------------|--------------------------------|
| <i>Tilia platyphyllos</i>                        | Malvaceae | anemochorous | hermaphrodis<br>m, SI, FX   | diploid, x = 41 | cp 41.0 <sup>RFLP</sup> ( $G_{st}$ ) | 9  | 5.6         | 13 <sup>ha</sup> | na               | Fineschi<br>unpubl. in<br>[63] |
|                                                  |           |              |                             |                 | n 10.3 <sup>SSR</sup>                | 8  | 14.5 (8–26) | 13               | regional (500)   | [220]                          |
| <i>Tilia tomentosa</i>                           | Malvaceae | anemochorous | hermaphrodis<br>m           | diploid, x = 41 |                                      |    |             |                  |                  |                                |
| <i>Ulmus glabra</i>                              | Ulmaceae  | anemochorous | hermaphrodis<br>m, SC–SI, M | diploid, x = 14 | cp 61.0 <sup>RFLP</sup> ( $G_{st}$ ) | 20 | 7.0         | 28 <sup>ha</sup> | na               | Musch<br>unpubl. in<br>[63]    |
| <i>Ulmus laevis</i>                              | Ulmaceae  | anemochorous | hermaphrodis<br>m, SI, X    | diploid, x = 14 | 33 <sup>iso</sup>                    | 12 | na (40–50)  | 18               | country (na)     | [173]                          |
| <i>Ulmus minor</i> (incl.<br><i>U. procera</i> ) | Ulmaceae  | anemochorous | hermaphrodis<br>m, SC, FX   | diploid, x = 14 | cp 47.0 <sup>RFLP</sup> ( $G_{st}$ ) | 29 | 6.1         | 32 <sup>ha</sup> | continental (na) | [25,63]                        |
|                                                  |           |              |                             |                 | 17.9 <sup>iso</sup>                  | 5  | 33 (19–58)  | 3                | country (c. 500) | [221]                          |

<sup>1</sup> data from Klotz et al. [222] and <http://forest.jrc.ec.europa.eu/european-atlas-of-forest-tree-species/>; <sup>2</sup> generative sporophytic ploidy = the number of chromosome sets with base number x carried by the nuclei of the sporophyte; secondary source: Chromosome Counts Database (CCDB)—<http://ccdb.tau.ac.il/home/>; <sup>3</sup> Unless stated otherwise measures are  $F_{st}$  values. Indices signify the type of marker system used: <sup>AFLP</sup> Amplified Fragment Length Polymorphism, <sup>iso</sup> Isoenzyme, <sup>ISSR</sup> Interspersed simple sequence repeats, <sup>miniS</sup> Mini-satellites, <sup>RFLP</sup> DNA restriction fragment length polymorphism, <sup>SNP</sup> single nucleotide polymorphism, <sup>SSR</sup> Microsatellites; cp = chloroplast marker, mt = mitochondrial marker, n = nuclear marker; <sup>4</sup> ha = haplotype, mo = inclusively of monomorphic loci, ph = molecular phenotype, po = polymorphic loci; <sup>5</sup> the (approximate) extent of the study area in kilometers is provided in parentheses; <sup>6</sup> differentiation measure calculated including monomorphic loci; <sup>7</sup>  $F_{st}$  was calculated from the original data for which no or Gregorius' differentiation measures  $d_0$ ,  $\delta_T$  or  $\delta$  [223–224] are provided; <sup>8</sup> used secondary literature: [167]; <sup>9</sup> the group comprises of sexual and apomictic microspecies [226,227]; <sup>10</sup> the group comprises of mostly facultative apomictic microspecies [226,227] of hybrid origin (*S. aria* group × *S. torminalis*); <sup>11</sup> the group comprises of sexual and facultative apomictic microspecies [227] of hybrid origin (*S. aria* group × *S. aucuparia*); <sup>12</sup> percent variation within two regions representing the distribution areas of subsp. *africana* and subsp. *thurifera*, respectively; <sup>13</sup> seeds collected from 30 to 50 points; <sup>14</sup>  $d_0$  = average genetic distance [223,228]; <sup>15</sup> for seven populations only the exact samples size is provided; <sup>16</sup> populations introgressed by *Populus tremula*; <sup>17</sup> calculated based on the number of unique genotypes; <sup>18</sup> differentiation among regions; <sup>19</sup> some populations introgressed by *Qu. Petraea*; <sup>20</sup> haploid endosperms; <sup>21</sup> some populations introgressed by *Qu. robur* and *Qu. pubescens*.

## References

1. The Angiosperm Phylogeny Group. An update of the angiosperm phylogeny group classification for the orders and families of flowering plants: APG II. *Bot. J. Linn. Soc.* **2003**, *141*, 399–436.
2. Ballian, D.; Bogunic, F.; Bajric, M.; Kajba, D.; Kraigher, H.; Konnert, M. The genetic population study of Balkan Silver Fir (*Abies alba* Mill.). *Period. Biol.* **2012**, *114*, 55–65.
3. Bergmann, F. Causes and consequences of species-specific genetic variation patterns in European tree species: Examples with Norway spruce and Silver fir. In *Genetic Variation of European Populations of Forest Trees*; Müller-Starck, G.; Ziehe, M., Eds.; J.D. Sauerländer's Verlag: Frankfurt am Main, Germany, 1991; pp. 192–204.
4. Bergmann, F. Teil, A. Genetik und Waldbau der Weisstanne. Teil 2 Forschungsbericht. *Schriftenreihe Sächsischen Landesanstalt Forsten* **1994**, *5*, 4–60.
5. Bergmann, F. Teil, B. Genetik und Waldbau der Weisstanne. Teil 2 Forschungsbericht. *Schriftenreihe Sächsischen Landesanstalt Forsten* **1994**, *5*, 65–78.
6. Breitenbach-Dorfer, M.; Müller, F.; Pinsker, W.; Hacker, R. Allozyme variation in populations of *Abies alba* from six regions of Austria. In *Population Genetics and Genetic Conservation of Forest Trees*; Baradat, P., Adams, W.T., Müller-Starck, G., Eds.; SPB Academic Publishing: Amsterdam, The Netherlands, 1995; pp. 237–245.
7. Breitenbach-Dorfer, M.; Konnert, M.; Pinsker, W.; Starlinger, F.; Geburek, Th. The contact zone between two migration routes of silver fir, *Abies alba* (Pinaceae), revealed by allozyme studies. *Plant Syst. Evol.* **1997**, *206*, 259–272.
8. Geburek, Th. Genetic variation of Norway spruce (*Picea abies* [L.] Karst.) populations in Austria. II. Microspatial patterns derived from nuclear sequence tagged microsatellite sites. *For. Genet.* **1998**, *5*, 231–237.
9. Geburek, Th. Genetic variation of Norway spruce (*Picea abies* [L.] Karst.) populations in Austria. I. Digenic disequilibrium and microspatial patterns derived from allozymes. *For. Genet.* **1998**, *5*, 221–230.
10. Gömöry, D.; Paule, L.; Krajmerová, D.; Romsáková, I.; Longauer, R. Admixture of genetic lineages of different glacial origin: A case study of *Abies alba* Mill. in the Carpathians. *Plant Syst. Evol.* **2012**, *298*, 703–712.
11. Hussendörfer, E. Genetic variation of silver fir populations (*Abies alba* Mill.) in Switzerland. *For. Genet.* **1999**, *6*, 101–113.
12. Konnert, M. Ergebnisse isoenzymatischer Untersuchungen bei der Weißtanne als Entscheidungshilfe für forstliche Maßnahmen. In *Ergebnisse des 7. IUFRO-Tannensymposiums der WP S.01-08 "Ökologie und Waldbau der Weißtanne"*; Eder, W., Ed.; IUFRO: Mainz, Germany, 1995; pp. 30–43.
13. Korshikov, I.I.; Pirko, N.N.; Pirko, Y.V. Genetic variation and differentiation of *Abies alba* Mill. populations from Ukrainian Carpathians. *Russ. J. Genet.* **2005**, *41*, 275–283.
14. Lewandowski, A.; Filipiak, M.; Burczyk, J. Genetic variation of *Abies alba* Mill. in Polish part of Sudety Mts. *Acta Soc. Bot. Pol.* **2001**, *70*, 215–219.
15. Longauer, R. Genetic differentiation and diversity of European silver fir in eastern part of its natural range. In *Ergebnisse des 7. IUFRO-Tannensymposiums der WP S.01-08 "Ökologie und Waldbau der Weißtanne"*; Eder, W., Ed.; IUFRO: Mainz, Germany, 1995; pp. 155–163.
16. Matusova, R. Genetic variation in five populations of silver fir (*Abies alba* Mill.) in Slovakia. *Biologia* **1995**, *50*, 53–59.
17. Mejnartowicz, L.; Lewandowski, A.; Bergmann, F. Genetic structure and variation of the European silver-fir populations at man made range disjunction. In *Ergebnisse des 7. IUFRO-Tannensymposiums der WP S.01-08 "Ökologie und Waldbau der Weißtanne"*; Eder, W., Ed.; IUFRO: Mainz, Germany, 1995; pp. 118–126.
18. Mosca, E.; Eckert, A.J.; Di Pierro, E.A.; Rocchini, D.; La Porta, N.; Belletti, P.; Neale, D.B. The geographical and environmental determinants of genetic diversity for four alpine conifers of the European Alps. *Mol. Ecol.* **2012**, *22*, 5530–5545.
19. Parducci, L.; Szmidi, A.E.; Villani, F.; Wang, X.-R.; Cherubini, M. Genetic variation of *Abies* in Italy. *Hereditas* **1996**, *125*, 11–18.
20. Piovani, P.; Leonardi, S.; Piotti, A.; Menozzi, P. Conservation genetics of small relic populations of silver fir (*Abies alba* Mill.) in the northern Apennines. *Plant Biosyst.* **2010**, *144*, 683–691.
21. Schröder, S. Die Isoenzym-Variation der Weißtanne (*Abies alba* Mill.) 16 europäischer Provenienzen. *Mitteilungen Vereins Forstliche Standortskunde Forstpflanzenzüchtung* **1989**, *34*, 77–81.

22. Vendramin, G.G.; Degen, B.; Petit, R.J.; Anzidei, M.; Ziegenhagen, B. High level of variation at *Abies alba* chloroplast microsatellite loci in Europe. *Mol. Ecol.* **1999**, *8*, 1117–1126.
23. Gömöry, D.; Paule, L. Spatial and microgeographical genetic differentiation of black alder (*Alnus glutinosa* Gaertn.) populations. *For. Ecol. Manag.* **2002**, *160*, 3–9.
24. King, R.A.; Ferris, C. Chloroplast DNA phylogeography of *Alnus glutinosa* (L.) Gaertn. *Mol. Ecol.* **1998**, *7*, 1151–1161.
25. Petit, R.J.; Aguinagalde, I.; Beaulieu, J.-L.D.; Bittkau, Ch.; Brewer, S.; Cheddadi, R.; Ennos, R.A.; Fineschi, S.; Grivet, D.; Lascoux, M.; et al. Glacial refugia: Hotspots but not melting pots of genetic diversity. *Science* **2003**, *300*, 1563–1565.
26. Prat, D.; Leger, C.; Bojovic, S. Genetic diversity among *Alnus glutinosa* (L.) Gaertn. populations. *Acta Oecol.* **1992**, *13*, 469–477.
27. Eriksson, G.; Black-Samuelsson, S.; Jensen, M.; Myking, T.; Rusanen, M.; Skrøppa, T.; Vakkari, P.; Westergaard, L. Genetic variability in two tree species, *Acer platanoides* L. and *Betula pendula* Roth, with contrasting life-history traits. *Scand. J. For. Res.* **2003**, *18*, 320–331.
28. Rusanen, M.; Vakkari, P.; Blom, A. Genetic structure of *Acer platanoides* and *Betula pendula* in northern Europe. *Can. J. For. Res.* **2003**, *33*, 1110–1115.
29. Palmé, A.E.; Su, Q.; Rautenberg, A.; Manni, F.; Lascoux, M. Postglacial recolonization and cpDNA variation of silver birch, *Betula pendula*. *Mol. Ecol.* **2003**, *12*, 201–212.
30. Palmé, A.E.; Su, Q.; Palsson, S.; Lascoux, M. Extensive sharing of chloroplast haplotypes among European birches indicates hybridization among *Betula pendula*, *B. pubescens* and *B. nana*. *Mol. Ecol.* **2004**, *13*, 167–178.
31. Coart, E.; van Glabeke, S.; Petit, R.J.; van Bockstaele, E.; Roldan-Ruiz, I. Range wide versus local patterns of genetic diversity in hornbeam (*Carpinus betulus* L.). *Conserv. Genet.* **2005**, *6*, 259–273.
32. Grivet, D.; Petit, R.J. Chloroplast DNA phylogeography of the hornbeam in Europe: Evidence for a bottleneck at the outset of postglacial colonization. *Conserv. Genet.* **2003**, *4*, 47–56.
33. Ballian, D.; Isajev, A.; Danicic, V.; Cvjetkoviv, B.; Bogunic, F.; Mataruga, M. Genetic differentiation in seed stands of European beech (*Fagus sylvatica* L.) in part pf Bosnia and Herzegovina. *Genetika* **2013**, *45*, 895–906.
34. Belletti, P.; Lanteri, S. Allozyme variation among European beech (*Fagus sylvatica* L.) stands in Piemont, north-western Italy. *Silvae Genet.* **1996**, *45*, 33–37.
35. Božic, G.; Ivankovic, M.; Kutnar, L. Genetic structure of European beech (*Fagus sylvatica* L.) seed stands from different sites of Gorjanci mountains as revealed by isozymes. *Šumarski List* **2013**, *1–2*, 25–32.
36. Buiteveld, J.; Vendramin, G.G.; Leonardi, S.; Karner, K.; Geburek, Th. Genetic diversity and differentiation in European beech (*Fagus sylvatica* L.) stands varying in management history. *For. Ecol. Manag.* **2007**, *247*, 98–106.
37. Comps, B.; Barrière, G.; Merzeau, D.; Letouzey, J. La variabilité alloenzymatique des hêtraies dans les sous-domaines médio- et eu-atlantiques d'Europe. *Can. J. For. Res.* **1987**, *17*, 1043–1049.
38. Comps, B.; Thiebaut, B.; Paule, L.; Merzeau, D.; Letouzey, J. Allozymic variability in beechwoods (*Fagus sylvatica* L.) over Central Europe: Spatial differentiation among and within populations. *Heredity* **1990**, *65*, 407–417.
39. Comps, B.; Thiebaut, B.; Sugar, I.; Trinajstic, I.; Plazibat, M. Genetic variation of the Croatian beech stands (*Fagus sylvatica* L.): Spatial differentiation in connection with the environment. *Ann. Sci. For.* **1991**, *48*, 15–28.
40. Comps, B.; Matyas, C.; Letouzey, J.; Geburek, T. Genetic variation in beech populations (*Fagus sylvatica* L.) along the alpine chain and in the Hungarian basin. *For. Genet.* **1998**, *5*, 1–9.
41. Comps, B.; Gömöry, D.; Letouzey, J.; Thiebaut, B.; Petit, R.J. Diverging trends between heterozygosity and allelic richness during postglacial colonization in the European beech. *Genetics* **2001**, *157*, 389–397.
42. Cuguen, J.; Merzeau, D.; Thiebaut, B. Genetic structure of the European beech stands (*Fagus sylvatica* L.): F-statistics and importance of the mating system characteristics in their evolution. *Heredity* **1988**, *60*, 91–100.
43. Demesure, B.; Comps, B.; Petit, R.J. Chloroplast DNA phylogeography of the common beech (*Fagus sylvatica* L.) in Europe. *Evolution* **1996**, *50*, 2515–2520.

44. Gömöry, D.; Vysny, J.; Comps, B.; Thiebaut, B. Geographical patterns of genetic differentiation and diversity in European beech (*Fagus sylvatica* L.) populations in France. *Biologia (Bratislava)* **1992**, *47*, 571–579.
45. Gömöry, D.; Hynek, V.; Paule, L. Delineation of seed zones for European beech (*Fagus sylvatica* L.) in the Czech Republic based on isozyme gene markers. *Ann. Sci. For.* **1998**, *55*, 425–436.
46. Gömöry, D.; Paule, L.; Brus, R.; Zhelev, P.; Tomovic, Z.; Gracan, J. Genetic differentiation and phylogeny of beech on the Balkan peninsula. *J. Evol. Biol.* **1999**, *12*, 746–754.
47. Gömöry, D.; Paule, L.; Schvadchak, I.M.; Popescu, F.; Sulkowska, M.; Hynek, V.; Longauer, R. Spatial patterns of the genetic differentiation in European beech (*Fagus sylvatica* L.) at allozyme loci in the Carpathians and adjacent regions. *Silvae Genet.* **2003**, *52*, 78–83.
48. Gömöry, D.S.; Paule, L.; Vysny, J. Patterns of allozyme variation in western Eurasian *Fagus*. *Bot. J. Linn. Soc.* **2007**, *154*, 165–174.
49. Hattemer, H.H.; Ziehe, M. Origin of a beech (*Fagus sylvatica* L.) stand in Rheinland-Pfalz (Germany). *Silvae Genet.* **1996**, *45*, 276–283.
50. Hatziskakis, S.; Papageorgiou, A.C.; Gailing, O.; Finkeldey, R. High chloroplast haplotype diversity in Greek populations of beech (*Fagus sylvatica* L.). *Plant Biol.* **2009**, *11*, 425–433.
51. Hazler, K.; Comps, B.; Šugar, I.; Melovski, L.; Tashev, A.; Gracan, J. Genetic structure of *Fagus sylvatica* L. populations in Southeastern Europe. *Silvae Genet.* **1997**, *46*, 229–236.
52. Konnert, M. Investigations on the genetic variation of beech (*Fagus sylvatica* L.) in Bavaria. *Silvae Genet.* **1995**, *44*, 346–351.
53. Leonardi, S.; Menozzi, P. Genetic variability of *Fagus sylvatica* L. in Italy: The role of postglacial recolonization. *Heredity* **1995**, *75*, 35–44.
54. Leonardi, S.; Piovani, P.; Scalfi, M.; Piotti, A.; Giannini, R.; Menozzi, P. Effect of habitat fragmentation on the genetic diversity and structure of peripheral populations of beech in Central Italy. *J. Hered.* **2012**, *103*, 408–417.
55. Merzeau, D.; Comps, B.; Thiebaut, B.; Cuguen, J.; Letouzey, J. Genetic structure of natural stands of *Fagus sylvatica* L. (beech). *Heredity* **1994**, *72*, 269–277.
56. Müller-Starck, G.; Ziehe, M. Genetic variation in populations of *Fagus sylvatica* L., *Quercus robur* L., and *Q. petraea* Liebl. in Germany. In *Genetic Variation in European Populations of Forest Trees*; Müller-Starck, G., Ziehe, M., Eds.; J.D. Sauerländer's Verlag: Frankfurt am Main, Germany, 1991; pp. 125–140.
57. Paule, L.; Gömöry, D.; Vysny, J. Genetic diversity and differentiation of beech populations in Eastern Europe. Genetics and silviculture of beech. In Proceedings from the 5th Beech Symposium of the IUFRO Project Group P1.10-10, Mogenstrup, Denmark, 19–24 September 1994; Madsen, S., Ed.; Danish Forest and Landscape Research Institute: Hørsholm, Denmark, 1995; pp. 159–167.
58. Rajendra, K.C.; Seifert, S.; Prinz, K.; Gailing, O.; Finkeldey, R. Subtle human impacts on neutral genetic diversity and spatial patterns of genetic variation in European beech (*Fagus sylvatica*). *For. Ecol. Manag.* **2014**, *319*, 138–149.
59. Turok, J. Levels of genetic variation in 20 beech (*Fagus sylvatica* L.) populations from Western Germany. In *The Scientific Basis for the Evaluation of Forest Genetic Resources of Beech*; Muhs, H.J., Wühlisch, G.V., Eds.; Federal Research Centre for Forestry and Forest Products: Grosshansdorf, Germany, 1993; pp. 181–195.
60. Wang, K.S. Gene flow in European beech (*Fagus sylvatica* L.). *Genetica* **2004**, *122*, 105–113.
61. Heuertz, M.; Carnevale, S.; Fineschi, S.; Sebastiani, F.; Hausman, J.-F.; Paule, L.; Vendramin, G.G. Chloroplast DNA phylogeography of European ashes, *Fraxinus* sp. (Oleaceae): Roles of hybridization and life history traits. *Mol. Ecol.* **2006**, *15*, 2131–2140.
62. Temunovic, M.; Franjic, J.; Satovic, Z.; Grgurev, M.; Frascaria-Lacoste, N.; Fernandez-Manjarres, J.F. Environmental heterogeneity explains the genetic structure of continental and Mediterranean populations of *Fraxinus angustifolia* Vahl. *PLoS ONE* **2012**, *7*, e42764.
63. Aguinalalde, I.; Hampe, A.; Mohanty, A.; Martín, J.P.; Duminil, J.; Petit, R.J. Effects of life history traits and species distribution on genetic structure at maternally inherited markers in European trees and shrubs. *J. Biogeogr.* **2005**, *32*, 329–339.
64. Ballian, D.; Monteleone, I.; Ferrazzini, D.; Kajba, D.; Belletti, P. Genetic characterization of common ash (*Fraxinus excelsior* L.) populations in Bosnia and Herzegovina. *Period. Biol.* **2008**, *110*, 323–328.
65. Gömöry, D.; Paule, L.; Krajmerová, D.; Romsáková, I.; Piecka, J. Gene exchange across a postglacial contact zone in *Fraxinus excelsior* L. *Silvae Genet.* **2012**, *61*, 18–27.

66. Heuertz, M.; Hausman, J.-F.; Tsvetkov, I.; Frascaria-Lacoste, N.; Vekemans, X. Assessment of genetic structure within and among Bulgarian populations of the common ash (*Fraxinus excelsior* L.). *Mol. Ecol.* **2001**, *10*, 1615–1623.
67. Heuertz, M.; Fineschi, S.; Anzidei, M.; Pastorelli, R.; Salvini, D.; Paule, L.; Frascaria-Lacoste, N.; Hardy, O.J.; Vekemans, X.; Vendramin, G.G. Chloroplast DNA variation and postglacial recolonization of common ash (*Fraxinus excelsior* L.) in Europe. *Mol. Ecol.* **2004**, *13*, 3437–3452.
68. Hantemirova, E.V.; Berkutenko, A.N.; Semerikov, V.L. Systematics and gene geography of *Juniperus communis* inferred from isoenzyme data. *Russ. J. Genet.* **2012**, *48*, 920–926.
69. Michalczyk, I.M.; Opgenoorth, L.; Luecke, Y.; Huck, S.; Ziegenhagen, B. Genetic support for perglacial survival of *Juniperus communis* L. in Central Europe. *Holocene* **2010**, *20*, 887–894.
70. Oostermeijer, J.G.B.; Knecht, B.D. Genetic population structure of the wind-pollinated, dioecious shrub *Juniperus communis* in fragmented Dutch heathlands. *Plant Species Biol.* **2004**, *19*, 178–184.
71. Provan, J.; Beatty, G.; Hunter, A.M.; McDonald, R.A.; McLaughlin, E.; Preston, S.J.; Wilson, S. Restricted gene flow in fragmented populations of a wind-pollinated tree. *Conserv. Genet.* **2008**, *9*, 1521–1532.
72. Teixeira, H.; Rodriguez-Echeverria, S.; Nabais, C. Genetic diversity and differentiation of *Juniperus thurifera* in Spain and Morocco as determined by SSR. *PLoS ONE* **2014**, *10*, e0126042.
73. Malvolti, M.E.; Fineschi, S.; Pigliucci, M. Morphological integration and genetic variability in *Juglans regia* L. *J. Hered.* **1994**, *85*, 389–394.
74. Pollegioni, P.; Woeste, K.; Olimpieri, I.; Marandola, D.; Cannata, F.; Malvolti, M.E. Long-term human impacts on genetic structure of Italian walnut inferred by SSR markers. *Tree Genet. Genomes* **2011**, *7*, 707–723.
75. Lewandowski, A.; Mejnartowicz, L. Levels and patterns of allozyme variation in some European larch (*Larix decidua*) populations. *Hereditas* **1991**, *115*, 221–226.
76. Maier, J. Genetic variation in European larch (*Larix decidua* Mill.). *Ann. For. Sci.* **1992**, *49*, 39–47.
77. Wagner, S. History of the European Larch (*Larix decidua* Mill.). Ph.D. Thesis, Universite Sciences et Technologies Bordeaux, Bordeaux, France, 2013.
78. Bergmann, F. Genetischer Abstand zwischen Populationen. II. Die Bestimmung des genetischen Abstands zwischen europäischen Fichtenpopulationen (*Picea abies*) auf der Basis von Isoenzym-Genhäufigkeiten. *Silvae Genet.* **1974**, *23*, 28–32.
79. Geburek, Th. Genetic variation of Norway spruce (*Picea abies* [L.] Karst.) populations in Austria. III. Macrospatial allozyme patterns of high elevation populations. *For. Genet.* **1999**, *6*, 201–211.
80. Giannini, R.; Morgante, M.; Vendramin, G.G. Allozyme variation in Italian populations of *Picea abies* (L.) Karst. *Silvae Genet.* **1991**, *40*, 160–166.
81. Gugerli, F.; Sperisen, C.; Büchler, U.; Magni, F.; Geburek, T.; Jeandroz, S.; Senn, J. Haplotype variation in a mitochondrial tandem repeat of Norway spruce (*Picea abies*) populations suggests a serious founder effect during postglacial recolonization of the western Alps. *Mol. Ecol.* **2001**, *10*, 1255–1263.
82. Lagercrantz, U.; Ryman, N. Genetic structure of Norway spruce (*Picea abies*): Concordance of morphological and allozymic variation. *Evolution* **1990**, *44*, 38–53.
83. Lundkvist, K.; Rudin, D. Genetic variation in eleven populations of *Picea abies* as determined by isozyme analysis. *Hereditas* **1977**, *85*, 67–74.
84. Lundkvist, K. Allozyme frequency distributions in four Swedish populations of Norway spruce (*Picea abies* K.) I. Estimations of genetic variation within and among populations, genetic linkage and a mating system parameter. *Hereditas* **1979**, *90*, 127–143.
85. Meloni, M.; Perini, D.; Binelli, G. The distribution of genetic variation in Norway spruce (*Picea abies* Karst.) populations in the western Alps. *J. Biogeogr.* **2007**, *34*, 929–938.
86. Morgante, M.; Vendramin, G.G. Genetic variation in Italian populations of *Picea abies* (L.) Karst. and *Pinus leucodermis* Ant. In *Genetic Variation in European Populations of Forest Trees*; Müller-Starck, G., Ziehe, M., Eds.; J.D. Sauerländer's Verlag, Frankfurt am Main, Germany, 1991; pp. 205–227.
87. Müller-Starck, G. Genetic variation in high elevation populations in Norway spruce (*Picea abies* (L.) Karst. in Switzerland. *Silvae Genet.* **1995**, *44*, 356–362.
88. Muona, O.; Paule, L.; Szmidt, A.E.; Kärkkäinen, K. Mating system analysis in a Central and Northern European population of *Picea abies*. *Scand. J. For. Res.* **1990**, *5*, 97–102.

89. Radu, G.H.; Sofletea, N.; Curtu, A.L. Allozyme genetic variation and spatial genetic structure in two populations of Norway spruce (*Picea abies* [L.] Karst) from different levels of altitude from Postavarul Mountain. *Rev. Padurilor* **2012**, *127*, 3–8.
90. Radu, G.H.; Curtu, A.L.; Spârchez, G.; Sofletea, N. Genetic diversity of Norway spruce [*Picea abies* (L.) Karst.] in Romanian Carpathians. *Ann. For. Res.* **2014**, *57*, 19–29.
91. Sperisen, C.; Büchler, U.; Gugerli, F.; Mátyás, G.; Geburek, T.; Vendramin, G.G. Tandem repeats in plant mitochondrial genomes: Application to the analysis of population differentiation in the conifer Norway spruce. *Mol. Ecol.* **2001**, *10*, 257–263.
92. Stutz, H.P. Eigenschaften und Ursachen der genetischen Differenzierung der Fichte im Wallis (Schweiz). Erhaltung forstlicher Genressourcen. In *Schriften aus der Forstlichen Fakultät der Universität Göttingen und der Niedersächsischen forstlichen Versuchsanstalt*; Hattemer, H.H., Ed.; J.D. Sauerländer's Verlag: Frankfurt am Main, Germany, 1990; pp. 99–114.
93. Tigerstedt, P.M.A. Genetic adaptation of plants in the subarctic environment. *Holarct. Ecol.* **1979**, *2*, 264–268.
94. Tollefsrud, M.M.; Kissling, R.; Gugerli, F.; Johnsen, Ø.; Skrøppa, T.; Cheddadi, R.; van der Knaap, W.O.; Lataowa, M.; Terhürne-Berson, R.; Litt, T.; et al. Genetic consequences of glacial survival and postglacial colonization in Norway spruce: Combined analysis of mitochondrial DNA and fossil pollen. *Mol. Ecol.* **2008**, *17*, 4134–4150.
95. Tollefsrud, M.M.; Snsteb, J.H.; Brochmann, Ch.; Johnsen, Ø.; Skrøppa, T.; Vendramin, G.G. Combined analysis of nuclear and mitochondrial markers provide new insight into the genetic structure of North European *Picea abies*. *Heredity* **2009**, *102*, 549–562.
96. Unger, G.M.; Konrad, H.; Geburek, Th. Does spatial genetic structure increase with altitude? An answer from *Picea abies* in Tyrol, Austria. *Plant Syst. Evol.* **2011**, *292*, 133–141.
97. Vendramin, G.G.; Anzidei, M.; Madaghiele, A.; Sperisen, C.; Bucci, G. Chloroplast microsatellite analysis reveals the presence of population subdivision in Norway spruce (*Picea abies* K.). *Genome* **2000**, *43*, 68–78.
98. Belletti, P.; Gullace, S. Biodiversità e struttura genetica in popolazioni di pino cembro e pino silvestre dell'arco alpino occidentale. *Sherwood-Foreste Albergi Oggi* **1999**, *5*, 11–16.
99. Belokon, M.M.; Belokon, Y.S.; Politov, D.V.; Altukhov, Y.P. Allozyme polymorphism of Swiss stone pine *Pinus cembra* L. in mountain populations of the Alps and the Eastern Carpathians. *Russ. J. Genet.* **2005**, *41*, 1268–1280.
100. Gugerli, F.; Rüegg, M.; Vendramin, G.G. Gradual decline in genetic diversity in Swiss stone pine populations (*Pinus cembra*) across Switzerland suggests postglacial re-colonization into the Alps from a common eastern glacial refugium. *Bot. Helv.* **2009**, *119*, 13–22.
101. Höhn, M.; Ábrán, P.; Vendramin, G.G. Genetic analysis of Swiss stone pine populations (*Pinus cembra* L. subsp. *cembra*) from the Carpathians using chloroplast microsatellites. *Acta Silv. Lignaria Hung.* **2005**, *1*, 39–47.
102. Lendvay, B.; Höhn, M.; Brodbeck, S.; Mîndrescu, M.; Gugerli, F. Genetic structure in *Pinus cembra* from the Carpathian Mountains inferred from nuclear and chloroplast microsatellites confirms post-glacial range contraction and identifies introduced individuals. *Tree Genet. Genomes* **2014**, *10*, 1419–1433.
103. Szmídt, A. Genetic variation in isolated populations of stone pine (*Pinus cembra*). *Silva Fenn.* **1982**, *16*, 196–200.
104. Agúndez, D.; Degen, B.; Wühlisch, G.V.; Alía, R. Genetic variation of Aleppo pine (*Pinus halepensis* Mill.) in Spain. *For. Genet.* **1997**, *4*, 201–209.
105. Bucci, G.; Anzidei, M.; Madaghiele, A.; Vendramin, G.G. Detection of haplotypic variation and natural hybridization in halepensis-complex pine species using chloroplast sequence repeat (SSR) markers. *Mol. Ecol.* **1998**, *7*, 1633–1643.
106. Działuk, A.; Boratyński, A.; Boratyńska, K.; Burczyk, J. Geographic patterns of genetic diversity of *Pinus mugo* (Pinaceae) in Central European mountains. *Dendrobiology* **2012**, *68*, 31–41.
107. Działuk, A.; Muchewicz, E.; Boratynski, A.; Montserrat, A.M.; Boratyńska, K.; Burczyk, J. Genetic variation of *Pinus uncinata* (Pinaceae) in the Pyrenees determined with cpSSR markers. *Plant Syst. Evol.* **2016**, *277*, 197–205.
108. Heuertz, M.; Teufel, J.; González-Martínez, S.C.; Soto, A.; Fady, B.; Alía, R.; Vendramin, G.G. Geography determines genetic relationships between species of mountain pine (*Pinus mugo* complex) in western Europe. *J. Biogeogr.* **2010**, *37*, 541–556.

109. Lewandowski, A.; Boratynski, A.; Mejnartowicz, L. Allozyme investigations on the genetic differentiation between closely related pines—*Pinus sylvestris*, *P. mugo*, *P. uncinata*, and *P. uliginosa* (Pinaceae). *Plant Syst. Evol.* **2000**, *221*, 15–24.
110. Neet-Sarqueda, C. Genetic differentiation of *Pinus sylvestris* L. and *Pinus mugo* aggr. populations in Switzerland. *Silvae Genet.* **1994**, *43*, 207–215.
111. Petit, R.J.; Duminil, J.; Fineschi, S.; Hampe, A.; Salvini, D.; Vendramin, G.G. Comparative organization of chloroplast, mitochondrial and nuclear diversity in plant populations. *Mol. Ecol.* **2005**, *14*, 689–701.
112. Bonnet-Masimbert, M.; Bikay-Bikay, V. Variabilité intraspécifique des isozymes de la glutamate-oxalacetate-transaminase chez *Pinus nigra* Arnold Intérêt pour la taxonomie des sous espèces. *Silvae Genet.* **1978**, *27*, 71–79.
113. Naydenov, K.D.; Tremblay, F.M.; Fenton, N.; Alexandrov, A. Structure of *Pinus nigra* Arn. populations in Bulgaria revealed by chloroplast microsatellites and terpenes analysis: Provenance tests. *Biochem. Syst. Ecol.* **2006**, *34*, 562–574.
114. Nikolic, D.; Tucic, N. Isoenzyme variation within and among populations of European black pine (*Pinus nigra* Arnold). *Silvae Genet.* **1983**, *32*, 80–89.
115. Scaltsoyiannes, A.; Rohr, R.; Panetsos, K.P.; Tsaktsira, M. Allozyme frequency distributions in five European populations of black pine (*Pinus nigra* Arnold). 1. Estimation of genetic variation within and among populations. 2. Contribution of isozyme analysis to the taxonomic status of the species. *Silvae Genet.* **1994**, *43*, 20–30.
116. Fallour, D.; Fady, B.; Lefèvre, F. Study on isozyme variation in *Pinus pinea* L.: Evidence for low polymorphism. *Silvae Genet.* **1997**, *46*, 201–207.
117. Vendramin, G.G.; Fady, B.; González-Martínez, S.C.; Hu, F.S.; Scotti, I.; Sebastiani, F.; Soto, A.; Petit, R.J. Genetically depauperate but widespread: The case of an emblematic mediterranean pine. *Evolution* **2008**, *63*, 680–688.
118. Belletti, P.; Ferrazzini, D.; Piotti, A.; Monteleone, I.; Ducci, F. Genetic variation and divergence in Scots pine (*Pinus sylvestris* L.) within its natural range in Italy. *Eur. J. For. Res.* **2012**, *131*, 1127–1138.
119. Goncharenko, G.G.; Silin, A.E.; Padutov, V.E. Allozyme variation in natural populations of Eurasian pines 3. Population structure, diversity, and gene flow in central and isolated populations of *Pinus sylvestris* L. in Eastern Europe and Siberia. *Silvae Genet.* **1994**, *43*, 119–132.
120. Gullberg, U.; Yazdani, R.; Rudin, D. Genetic differentiation among Scot pine (*Pinus sylvestris*). Population genetics of forest trees. Part IV. *Ecol. Differ. For. Trees* **1982**, *16*, 205–214.
121. Gullberg, U.; Yazdani, R.; Rudin, D.; Ryman, N. Allozyme variation in Scots Pine (*Pinus sylvestris* L.) in Sweden. *Silvae Genet.* **1985**, *34*, 193–201.
122. Karhu, A.; Hurme, P.; Karjalainen, M.; Karvonen, P.; Karkkainen, K.; Neale, D.; Savolainen, O. Do molecular markers reflect patterns of differentiation in adaptive traits of conifers? *Theor. Appl. Genet.* **1996**, *93*, 215–221.
123. Labra, M.; Grassi, F.; Sgorbati, S.; Ferrari, C. Distribution of genetic variability in southern populations of Scots pine (*Pinus sylvestris* L.) from the Alps to the Apennines. *Flora* **2006**, *201*, 468–476.
124. Mejnartowicz, L.; Palowski, B. Studies of Scots pine populations in polluted and clean areas. In *Genetic Effects of Air Pollutants in Forest Tree Populations*; Scholz, F., Gregorius, H.-R., Rudin, D., Eds.; Springer: Berlin/Heidelberg, Germany, 1989; pp. 115–125.
125. Mejnartowicz, L. Genetic variation in some isoenzyme loci in Scots pine (*Pinus sylvestris* L.) populations. *Arboretum Körnickie* **1979**, *24*, 91–104.
126. Müller-Strack, G. Genetic differentiation among seed samples provenances of *Pinus sylvestris* L. *Silvae Genet.* **1987**, *36*, 232–238.
127. Müller-Strack, G.; Gregorius, H.-R. Monitoring genetic variation in forest tree populations. In *Proceedings of the 18th IUFRO World Congress, Ljubljana, Yugoslavia, 7–21 September 1986; Volume 2*, pp. 589–599.
128. Muona, O.; Szmidt, A.E. A multilocus study of natural populations of *Pinus sylvestris*. In *Population Genetics in Forestry*; Gregorius, H.-R., Ed.; Springer: Berlin, Germany, 1985; pp. 226–240.
129. Naydenov, K.D.; Tremblay, F.M.; Alexandrov, A.; Fenton, N. Structure of *Pinus sylvestris* L. populations in Bulgaria revealed by chloroplast microsatellites and terpenes analysis: Provenance tests. *Biochem. Syst. Ecol.* **2005**, *33*, 1226–1245.

130. Provan, J.; Soranzo, N.; Wilson, N.J.; McNicol, J.W.; Forrest, G.I.; Cottrell, J.; Powell, W. Gene-pool variation in Caledonian and European Scots pine (*Pinus sylvestris* L.) revealed by chloroplast simple-sequence repeats. *Proc. R. Soc. Biol. Sci. Ser. B* **1998**, *265*, 1697–1705.
131. Prus-Glowacki, W.; Bernhard, E. Allozyme variation in populations of *Pinus sylvestris* L. from a 1912 provenance trial in Pulawy (Poland). *Silvae Genet.* **1994**, *43*, 132–138.
132. Prus-Glowacki, W.; Stephan, B.R. Genetic variation of *Pinus sylvestris* from Spain in relation to other European populations. *Silvae Genet.* **1994**, *43*, 7–14.
133. Prus-Glowacki, W.; Stephan, B.R.; Bujas, E.; Alia, R.; Marciniak, A. Genetic differentiation of autochthonous populations of *Pinus sylvestris* (Pinaceae) from the Iberian peninsula. *Plant Syst. Evol.* **2003**, *239*, 55–66.
134. Puglisi, S.; Attolico, M. Allozyme variation in natural populations of the Italian range of *Pinus sylvestris* L. *For. Genet.* **2000**, *7*, 221–232.
135. Robledo-Arnuncio, J.J.; Collada, C.; Alía, R.; Gil, L. Genetic structure of montane isolates of *Pinus sylvestris* L. in a Mediterranean refugial area. *J. Biogeogr.* **2005**, *32*, 595–605.
136. Rudin, D.; Erikson, E.; Ekberg, I.; Rasmuson, M. Studies of allele frequency and inbreeding in Scots pine populations by the aid of the isozyme technique. *Silvae Genet.* **1974**, *34*, 10–13.
137. Semerikov, V.L.; Semerikova, S.A.; Dymshakova, O.S.; Zatssepina, K.G.; Tarakanov, V.V.; Tikhonova, I.V.; Ekart, A.K.; Vidyakin, A.I.; Jamiyansuren, S.; Rogovtsev, R.V.; et al. Microsatellite loci polymorphism of chloroplast DNA of Scots pine (*Pinus sylvestris* L.) in Asia and Eastern Europe. *Russ. J. Genet.* **2014**, *50*, 577–585.
138. Sinclair, W.T.; Mormann, J.D.; Ennos, R.A. The postglacial history of Scots pine (*Pinus sylvestris* L.) in western Europe: Evidence from mitochondrial DNA variation. *Mol. Ecol.* **1999**, *8*, 83–88.
139. Soranzo, N.; Alía, R.; Provan, J.; Powell, W. Patterns of variation at a mitochondrial sequence-tagged-site locus provides new insights into the postglacial history of European *Pinus sylvestris* populations. *Mol. Ecol.* **2000**, *9*, 1205–1211.
140. Taeger, S.; Fussi, B.; Konnert, M.; Menzel, A. Large-scale genetic structure and drought-induced effects on European Scots pine (*Pinus sylvestris* L.) seedlings. *Eur. J. For. Res.* **2013**, *132*, 481–496.
141. Bittkau, Ch. *Charakterisierung der genetischen Variation europäischer Populationen von Acer spp. und Populus tremula auf der Basis der Chloroplasten-DNA: Rückschlüsse auf die postglaziale Ausbreitung und Differenzierung forstlicher Provenienzen Dissertation*; Technische Universität München: München, Germany, 2002; p. 87.
142. Castiglione, S.; Cicatelli, A.; Lupi, R.; Patrignani, G.; Fossati, T.; Brundu, G.; Sabatti, M.; van Loo, M.; Lexer, Ch. Genetic structure and introgression in riparian populations of *Populus alba* L. *Plant Biosyst.* **2010**, *144*, 656–668.
143. Jelic, M.; Patenkovic, A.; Skoric, M.; Misic, D.; Novicic, Z.K.; Bordacs, S.; Varhidi, F.; Vasic, I.; Benke, A.; Frank, G.; et al. Indigenous forests of European black poplar along the Danube River: Genetic structure and reliable detection of introgression. *Tree Genet. Genomes* **2015**, *11*, doi:10.1007/s11295-015-0915-5.
144. Legionnet, A.; Lefèvre, F. Genetic variation of the riparian pioneer tree species *Populus nigra* L. I. Study of population structure based on isozymes. *Heredity* **1996**, *77*, doi:10.1038/hdy.1996.190.
145. Smulders, M.J.M.; Cottrell, J.E.; Lefèvre, F.; van der Schoot, J.; Arens, P.; Vosman, B.; Tabbener, H.E.; Grassi, F.; Fossati, T.; Castiglione, S.; et al. Structure of the genetic diversity in black poplar (*Populus nigra* L.) populations across European river systems: Consequences for conservation and restoration. *For. Ecol. Manag.* **2008**, *255*, 1388–1399.
146. Hall, D.; Luquez, V.; Garcia, V.M.; St Onge, K.R.; Jansson, S.; Ingvarsson, P.K. Adaptive population differentiation in phenology across a latitudinal gradient in European aspen (*Populus tremula* L.): A comparison of neutral markers, candidate genes and phenotypic traits. *Evolution* **2007**, *61*, 2849–2860.
147. Svetlakova, T.N.; Boboshina, I.V.; Boronnikova, S.V.; Nechaeva, Y.S. An ecological and genetic analysis of the population structure of *Populus tremula* L. in the Perm region. *Russ. J. Genet.* **2013**, *3*, 382–387.
148. Svetlakova, T.N.; Boronnikova, S.V.; Yanbaev, Y.A. Short note: Genetic diversity and differentiation in Ural populations of the aspen, *Populus tremula* L., as revealed by inter-simple sequence repeat (ISSR) markers. *Silvae Genet.* **2014**, *63*, 39–41.
149. Samuel, R.; Pinsker, W.; Ehrendorfer, F. Electrophoretic analysis of genetic variation within and between populations of *Quercus cerris*, *Q. pubescens*, *Q. petraea* and *Q. robur* (Fagaceae) from Eastern Austria. *Bot. Acta* **1995**, *108*, 290–299.

150. Petit, R.J.; Brewer, S.; Bordács, S.; Burg, K.; Cheddadi, R.; Coart, E.; Cottrell, J.; Csaikl, U.M.; van Dam, B.; Deans, J.D.; et al. Identification of refugia and post-glacial recolonisation routes of European white oaks based on chloroplast DNA and fossil pollen evidence. *For. Ecol. Manag.* **2002**, *156*, 49–74.
151. Guzman, B.; Rodriguez Lopez, C.M.; Forrest, A.; Cano, E.; Vargas, P. Protected areas of Spain preserve the neutral genetic diversity of *Quercus ilex* L. irrespective of glacial refugia. *Tree Genet. Genomes* **2015**, *11*, 124.
152. Michaud, H.; Lumaret, R.; Romane, F. Variation in the genetic structure and reproductive biology of holm oak populations. *Vegetatio* **1992**, *99*, 107–113.
153. Michaud, H.; Toumi, L.; Lumaret, R.; Li, T.X.; Romane, F.; Di Giusto, F. Effect of geographical discontinuity on genetic variation in *Quercus ilex* L. (holm oak). Evidence from enzyme polymorphism. *Heredity* **1995**, *74*, 590–606.
154. Yacine, A.; Lumaret, R. Genetic diversity in Holm-oak (*Quercus ilex* L.): Insights from several enzyme markers. *Silvae Genet.* **1989**, *38*, 140–148.
155. Alberto, F.; Niort, J.; Derory, J.; Lepais, O.; Vitalis, R.; Galop, D.; Kremer, A. Population differentiation of sessile oak at the altitudinal front of migration in the French Pyrenees. *Mol. Ecol.* **2010**, *19*, 2626–2639.
156. Finkeldey, R.; Matyas, G. Genetic variation of oaks (*Quercus* spp.) in Switzerland. 3. Lack of impact of postglacial recolonization history on nuclear gene loci. *Theor. Appl. Genet.* **2003**, *106*, 346–352.
157. Kelleher, C.T.; Hodkinson, T.R.; Kelly, D.L.; Douglas, G.C. Characterisation of chloroplast DNA haplotypes to reveal the provenance and genetic structure of oaks in Ireland. *For. Ecol. Manag.* **2004**, *189*, 123–131.
158. Kremer, A.; Petit, R.J.; Zanetto, A.; Fougère, V.; Ducouso, A.; Wagner, D.; Chauvin, C. Nuclear and organelle gene diversity in *Quercus robur* and *Q. petraea*. In *Genetic Variation in European Populations of Forest Trees*; Müller-Starck, G., Ziehe, M., Eds.; J.D. Sauerländer's Verlag: Frankfurt am Main, Germany, 1991; pp. 141–166.
159. Le Corre, V.; Roussel, G.; Zanetto, A.; Kremer, A. Geographical structure of gene diversity in *Quercus petraea* (Matt.) Liebl. III. Patterns of variation identified by geostatistical analyses. *Heredity* **1998**, *80*, 464–473.
160. Moldovan, I.C.; Sofletea, N.; Curtu, A.L.; Abrudan, I.V.; Postolache, D.; Popescu, F. Chloroplast DNA diversity of oak species in Eastern Romania. *Not. Bot. Horti Agrobot. Cluj* **2010**, *38*, 302–307.
161. Muir, G.; Lowe, A.J.; Fleming, C.C.; Vogl, C. High nuclear genetic diversity, high levels of outcrossing and low differentiation among remnant populations of *Quercus petraea* at the margin of its range in Ireland. *Ann. Bot.* **2004**, *93*, 691–697.
162. Neophytou, C.; Michiels, H.-G. Upper Rhine Valley: A migration crossroads of middle European oaks. *For. Ecol. Manag.* **2013**, *304*, 89–98.
163. Neophytou, C.; Aravanopoulos, F.A.; Fink, S.; Dounavi, A. Detecting interspecific and geographic differentiation patterns in two interfertile oak species (*Quercus petraea* (Matt.) Liebl. and *Q. robur* L.) using small sets of microsatellite markers. *For. Ecol. Manag.* **2010**, *259*, 2026–2035.
164. Zanetto, A.; Roussel, G.; Kremer, A. Geographic variation of inter-specific differentiation between *Quercus robur* L. and *Quercus petraea* (Matt.) Liebl. *For. Genet.* **1994**, *1*, 111–123.
165. Petit, R.J.; Kremer, A.; Wagner, D.B. Geographic structure of chloroplast DNA polymorphisms in European oaks. *Theor. Appl. Genet.* **2016**, *87*, 122–128.
166. Slade, D.; Skvorc, Z.; Ballian, D.; Gracan, J.; Papeš, D. The chloroplast DNA polymorphisms of White Oaks of section *Quercus* in the Central Balkans. *Silvae Genet.* **2008**, *57*, 227–234.
167. Müller-Starck, G.; Baradat, Ph.; Bergmann, F. Genetic variation within European tree species. *New For.* **1992**, *6*, 23–47.
168. Zanetto, A.; Kremer, A. Geographical structure of gene diversity in *Quercus petraea* (Matt.) Liebl. I. Monolocus patterns of variation. *Heredity* **1995**, *75*, 506–517.
169. Ballian, D.; Ivankovic, M.; Gracan, J.; Peric, S.; Marjanovic, H.; Bobinac, M.; Slade, D. Analysis of pubescent oak (*Quercus pubescens* Willd.) by means of chloroplast DNA (cpDNA) in the western part of the Balkan Peninsula. *Acta Soc. Bot. Pol.* **2010**, *79*, 189–195.
170. Ballian, D.; Belletti, P.; Ferrazzini, D.; Bogunic, F.; Kajba, D. Genetic variability of Pedunculate Oak (*Quercus robur* L.) in Bosnia and Herzegovina. *Period. Biol.* **2010**, *112*, 353–363.

171. Gailing, O.; Wachter, H.; Heyder, J.; Rogge, M.; Finkeldey, R. Chloroplast DNA analyses of very old, presumably autochthonous *Quercus robur* L. stands in North Rhine-Westphalia. *Allg. Forst Jagdzeitg.* **2009**, *180*, 221–227.
172. Gehle, T. Genetische Differenzierung der Eiche (*Quercus robur*) in Nordrhein-Westfalen. *Allg. Forst Jagdzeitg.* **1999**, *170*, 183–188.
173. Mattila, A.; Vakkari, P. Genetic variation of *Quercus robur* and *Ulmus laevis* in Finland. In *Conservation of Forest Genetic Resources*; Nordic Group for Forest Genetics and Tree Breeding: Meeting in Estonia, 3–7 June 1996; Kurm, M., Tam, Y., Eds.; Estonian Agricultural University: Tartu, Estonia, **1997**; pp. 63–68.
174. Vakkari, P.; Rusanen, M.; Raisio, J.; Toivonen, H. Genetic variability of fragmented stands of pedunculate oak (*Quercus robur*) in Finland. *Genetica* **2006**, *127*, 231–241.
175. Mattila, A.; Pakkanen, A.; Vakkari, P.; Raisio, J. Genetic variation in English oak (*Quercus robur*) in Finland. *Silva Fenn.* **1994**, *28*, 251–256.
176. Schröder, H.; Degen, B. Genetic structure of the green oak leaf roller (*Tortrix viridana* L.) and one of its hosts, *Quercus robur* L. *For. Ecol. Manag.* **2008**, *256*, 1270–1279.
177. Cao, C.-P.; Leinemann, L.; Ziehe, M.; Finkeldey, R. Untersuchungen zur genetischen Variation und Differenzierung von Eibenbeständen mit Hilfe von Isoenzym- und DNS-Markern. *Allg. Forst Jagdzeitg.* **2004**, *175*, 21–28.
178. Dhar, A.; Klumpp, R. Genetic variation of English yew (*Taxus baccata* L.) in the eastern Alps and its implications for conservation management. In *Biodiversity of English Yew (Taxus baccata, L.) Populations in Austria*; Dhar, A., Ed.; University of Natural Resources and Applied Life Sciences: Vienna, Austria, **2008**; pp. 70–90.
179. Klumpp, R.; Dhar, A. Genetic variation of *Taxus baccata* L. populations in the Eastern Alps and its implications for conservation management. *Scand. J. For. Res.* **2011**, *26*, 294–304.
180. González-Martínez, S.C.; Dubreuil, M.; Riba, M.; Vendramin, G.G.; Sebastiani, F.; Mayol, M. Spatial genetic structure of *Taxus baccata* L. in the western Mediterranean Basin: Past and present limits to gene movement over a broad geographic scale. *Mol. Phylogenet. Evol.* **2016**, *55*, 805–815.
181. Hertel, H.; Kohlstock, N. Genetische Variation und geographische Struktur von Eibenvorkommen (*Taxus baccata* L.) in Mecklenburg-Vorpommern. *Silvae Genet.* **1996**, *45*, 290–294.
182. Romsáková, I.; Paule, L. Genetische Variabilität von Populationen von *Taxus baccata* L. *Sauteria* **2009**, *18*, 261–276.
183. Thoma, S. Genetische Unterschiede zwischen vier Reliktbeständen der Eibe (*Taxus baccata* L.). *Forst Holz* **1995**, *50*, 19–24.
184. Tröber, U.; Ballian, D. Genetic characterization of English yew (*Taxus baccata* L.) populations in Bosnia and Herzegovina. *Eur. J. For. Res.* **2011**, *130*, 479–489.
185. Myking, T.; Vakkari, P.; Skrøppa, T. Genetic variation in northern marginal *Taxus baccata* L. populations. Implications for conservation. *Forestry* **2009**, *82*, 529–539.
186. Forstbüro Ostbayern. Erfassung und Dokumentation genetischer Ressourcen des Feld-Ahorns (*Acer campestre*) und der Eibe (*Taxus baccata*) in Deutschland. In *Untersuchungen zum Feld-Ahorn. Endbericht 08. März 2013—korrigierte Fassung 23. Oktober 2014*; Forstbüro Ostbayern: Neukirchen bei Heiligen Blut, Germany, 2014; p. 75.
187. Rusanen, M.; Vakkari, P.; Blom, A. Evaluation of the Finnish gene-conservation strategy for Norway maple (*Acer platanoides* L.) in light of allozyme variation. *For. Genet.* **2000**, *7*, 155–165.
188. Belletti, P.; Monteleone, I.; Ferrazzina, D. Genetic variability at allozyme markers in sycamore (*Acer pseudoplatanus*) populations from northwestern Italy. *Canad. J. For. Res.* **2007**, *37*, 395–403.
189. Santiso, X.; Lopez, L.; Retuerto, R.; Barreiro, R. Population structure of a widespread species under balancing selection: The case of *Arbutus unedo* L. *Front. Plant Sci.* **2016**, *6*, doi:10.3389/fpls.2015.01264.
190. Coart, E.; Vekemans, X.; Smulders, M.J.M.; Wagner, I.; van Huylbroek, J.; van Bockstaele, E.; Roldan-Ruiz, I. Genetic variation in the endangered wild apple (*Malus sylvestris* (L.) Mill.) in Belgium as revealed by amplified fragment length polymorphism and microsatellite markers. *Mol. Ecol.* **2003**, *12*, 845–857.
191. Cornille, A.; Giraud, T.; Bellard, C.; Tellier, A.; Le Cam, B.; Smulders, M.J.M.; Kleinschmitt, J.; Roldan-Ruiz, I.; Gladieux, P. Postglacial recolonization history of the European crabapple (*Malus sylvestris* Mill.), a wild contributor to the domesticated apple. *Mol. Ecol.* **2012**, *22*, 2249–2263.
192. De Rogatis, A.; Ferrazzini, D.; Ducci, F.; Guerri, S.; Carnevale, S.; Belletti, P. Genetic variation in Italian wild cherry (*Prunus avium* L.) as characterized by nSSR markers. *Forestry* **2013**, *86*, 391–400.

193. Frascaria, N.; Santi, F.; Gouyon, P.H. Genetic differentiation within and among populations of chestnut (*Castanea sativa*) Mill.) and wild cherry (*Prunus avium* L.). *Heredity* **1993**, *70*, 634–641.
194. Jarni, K.; Cuyper, B.D.; Brus, R. Genetic variability of wild cherry (*Prunus avium* L.) seed stands in Slovenia as revealed by nuclear microsatellite loci. *PLoS ONE* **2012**, *10*, doi:10.1371/journal.pone.0041231.
195. Mariette, S.; Lefranc, M.; Legrand, P.; Taneyhill, D.; Frascaria-Lacoste, N.; Machon, N. Genetic variability in wild cherry populations in France. Effects of colonizing processes. *Theor. Appl. Genet.* **1997**, *94*, 904–908.
196. Mohanty, A.; Martian, J.P.; Aguinalalde, I. A population genetic analysis of chloroplast DNA in wild populations of *Prunus avium* L. in Europe. *Heredity* **2001**, *87*, 421–427.
197. Jordano, P.; Godoy, J.A. RAPD variation and population genetic structure in *Prunus mahaleb* (Rosaceae), an animal-dispersed tree. *Mol. Ecol.* **2000**, *9*, 1293–1305.
198. Wolko, L.; Bocianowski, J.; Antkowiak, W.; Slomski, R. Genetic diversity and population structure of wild pear (*Pyrus pyrausta* (L.) Burgsd.) in Poland. *Open Life Sci.* **2015**, *10*, 19–29.
199. Raspe, O.; Saumitou-Laprade, P.; Cuguen, J.; Jacquemart, A. Chloroplast DNA haplotype variation and population differentiation in *Sorbus aucuparia* L. (Rosaceae: Maloideae). *Mol. Ecol.* **2000**, *9*, 1113–1122.
200. Raspe, O.; Jacquemart, A.L. Allozyme diversity and genetic structure of European populations of *Sorbus aucuparia* L. (Rosaceae: Maloideae). *Heredity* **1998**, *81*, 537.
201. Bacles, C.F.E.; Lowe, A.J.; Ennos, R.A. Genetic effects of chronic habitat fragmentation on tree species: The case of *Sorbus aucuparia* in a deforested Scottish landscape. *Mol. Ecol.* **2004**, *13*, 573–584.
202. George, J.P.; Konrad, H.; Collin, E.; Thevenet, J.; Ballian, D.; Idzajt, M.; Kamm, U.; Zhelev, P.; Geburek, Th. High molecular diversity in the true service tree (*Sorbus domestica*) despite rareness: Data from Europe with special reference to the Austrian occurrence. *Ann. Bot.* **2016**, 1–11, doi:10.1093/aob/mcv047.
203. George, J.P.; Woodman, J.; Hampton, M.; Konrad, H.; Geburek, T. True Service-tree (*Sorbus domestica*, Rosaceae) in the British Isles: Rare but diverse. *New J. Bot.* **2016**, *6*, 21–30.
204. Angelone, S.; Hilfiker, K.; Holderegger, R.; Bergamini, A.; Hoebee, S. Regional population dynamics define the local genetic structure in *Sorbus torminalis*. *Mol. Ecol.* **2007**, *16*, 1291–1301.
205. Demesure, B.; Le Guerroue, B.; Lucchi, G.; Prat, D.; Petit, R.J. Genetic variability of a scattered temperate forest tree: *Sorbus torminalis* L. (Crantz). *Ann. For. Sci.* **2000**, *57*, 63–71.
206. Hoebee, S.E.; Menn, C.; Rotach, P.; Finkeldey, R.; Holderegger, R. Spatial genetic structure of *Sorbus torminalis*: The extent of clonal reproduction in natural stands of a rare tree species with a scattered distribution. *For. Ecol. Manag.* **2006**, *226*, 1–7.
207. KucEROVÁ, V.; Honec, M.; Paule, L.; Zhelev, P.; Gömöry, D. Genetic differentiation of *Sorbus torminalis* in Eastern Europe as determined by microsatellite markers. *Biologia* **2010**, *65*, 817–821.
208. Oddou-Muratorio, S.; Petit, R.J.; Le Guerroue, B.; Guesnet, D.; Demesure, B. Pollen- versus seed-mediated gene flow in a scattered forest tree species. *Evolution* **2001**, *55*, 1123–1135.
209. Fineschi, S.; Turchini, D.; Villani, F.; Vendramin, G.G. Chloroplast DNA polymorphism reveals little geographical structure in *Castanea sativa* Mill. (Fagaceae) throughout southern European countries. *Mol. Ecol.* **2000**, *9*, 1495–1503.
210. Fernández-Lopez, J.; Monteagudo, A.B. Genetic structure of wild Spanish populations of *Castanea sativa* as revealed by isozyme analysis. *For. Syst.* **2010**, *19*, 156–169.
211. Martín, M.A.; Mattioni, C.; Molina, J.R.; Alvarez, J.B.; Cherubini, M.; Herrera, M.A.; Villani, F.; Martín, L.M. Landscape genetic structure of chestnut (*Castanea sativa* Mill.) in Spain. *Tree Genet. Genomes* **2012**, *8*, 127–136.
212. Pigliucci, M.; Benedettelli, S.; Villani, F. Spatial pattern of genetic variability in Italian chestnut (*Castanea sativa*). *Can. J. Bot.* **1990**, *68*, 1962–1967.
213. Villani, F.; Pigliucci, M. Origin and evolution of European Chestnut: A population biology perspective. In *Genetic Variation in European Populations of Forest Trees*; Müller-Starck, G., Ziehe, M., Eds.; J.D. Sauerländer's Verlag: Frankfurt am Main, Germany, 1991; pp. 173–180.
214. Villani, F.; Benedettelli, S.; Paciucci, M.; Cherubini, M.; Pigliucci, M. Genetic variation and differentiation between natural populations of chestnut (*Castanea sativa* Mill.) from Italy. In *Biochemical Markers in the Population Genetics of Forest Trees*; Fineschi, S., Malvolti, M.E., Cannata, F., Hattemer, H.H., Eds.; SPB Academic Publishing: The Hague, The Netherlands, 1991; pp. 91–103.
215. Perdureau, A.C.; Kelleher, C.T.; Douglas, G.C.; Hodgkinson, T.R. High levels of gene flow and genetic diversity in Irish populations of *Salix caprea* L. inferred from chloroplast and nuclear SSR markers. *BMC Plant Biol.* **2014**, *14*, doi:10.1186/s12870-014-0202-x.

216. Berlin, S.; Trybush, S.O.; Fogelqvist, J.; Gyllenstrand, N.; Hallingbäck, H.R.; Åhman, I.; Nordh, N.-E.; Shield, I.; Powers, S.J.; Weih, M.; et al. Genetic diversity, population structure and phenotypic variation in European *Salix viminalis* L. (Salicaceae). *Tree Genet. Genomes* **2014**, *10*, 1595–1610.
217. Lascoux, M.; Thorsen, J.; Gullberg, U. Population structure of a riparian willow species, *Salix viminalis* L. *Genet. Res.* **1996**, *68*, 45–54.
218. Trybush, S.O.; Šárka, J.; Cížková, L.; Karp, A.; Hanley, S.J. High levels of genetic diversity in *Salix viminalis* of the Czech Republic as revealed by microsatellite markers. *Bioenergy Res.* **2012**, *5*, 969–977.
219. Fineschi, S.; Salvini, D.; Turchini, D.; Carnevale, S.; Vendramin, G.G. Chloroplast DNA variation of *Tilia cordata* (Tiliaceae). *Can. J. For. Res.* **2003**, *33*, 2503–2508.
220. Logan, S.A.; Phuekvilai, P.; Wolff, K. Ancient woodlands in the limelight: Delineation and genetic structure of ancient woodland species *Tilia cordata* and *Tilia platyphyllos* (Tiliaceae) in the UK. *Tree Genet. Genomes* **2015**, *11*, 52.
221. Machon, N.; Lefranc, M.; Bilger, I.; Mazer, S.J.; Sarr, A. Allozyme variation in *Ulmus* species from France: Analysis of differentiation. *Heredity* **1997**, *78*, 12–20.
222. Klotz St.; Kühn, I.; Durka, W. Bioflor—Eine Datenbank mit biologisch-ökologischen Merkmalen zur Flora von Deutschland. *Schriftenreihe Vegetationskunde* **2002**, *38*, 1–334.
223. Gregorius, H.-R. Genetischer Abstand zwischen Populationen. 1. Zur Konzeption der genetischen Abstandsmessung. *Silvae Genet.* **1974**, *23*, 22–27.
224. Gregorius, H.-R.; Roberds, J.H. Measurement of genetical differentiation among subpopulations. *Theor. Appl. Genet.* **1986**, *71*, 826–834.
225. Gregorius, H.-R. The relationship between the concepts of genetic diversity and differentiation. *Theor. Appl. Genet.* **1987**, *74*, 397–401.
226. Aldasoro, J.J.; Aedo, C.; Munoz Garmendia, F.; Pando de la Hoz, F. Revision of *Sorbus* Subgenera *Aria* and *Torminaria* (Rosaceae-Maloideae). *Syst. Bot. Monogr.* **2004**, *69*, 1–148.
227. Aldasoro, J.J.; Aedo, C.; Munoz Garmendia, F. The genus *Sorbus* (Maloideae, Rosaceae) in Europe and in North Africa: Morphological analysis and systematics. *Syst. Bot.* **1998**, *23*, 189–208.
228. Gregorius, H.-R. A unique genetic distance. *Biom. J.* **1984**, *26*, 13–18.

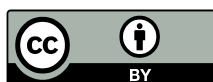

© 2017 by the authors. Submitted for possible open access publication under the terms and conditions of the Creative Commons Attribution (CC BY) license (<http://creativecommons.org/licenses/by/4.0/>).
